## SUBJECT INDEX TO VOLUME 74

Entries from JOURNAL departments are identified as follows: Book Reviews—(BR); Case Reports—(CR); Clinical Investigations—(CI); Correspondence—(CO); Editorial Views—(EV); Laboratory Investigations—(LI); Laboratory Reports—(LR); Original Article—(OA); Review Article—(RA); Medical Intelligence—(MI); Special Article—(SA); Reports of Scientific Meetings—(SM).

### A

- Acetylcholine, See under Parasympathetic nervous system**
- Acid-base balance**  
during cardiopulmonary resuscitation, influence of epinephrine on (LI) [Lindner, Ahnefeld, Bowdler & Prengel], 333
- Acid-base equilibrium**  
**acidosis**  
respiratory  
and neuromuscular effects of desflurane (CI) [Caldwell, Laster, Magorian, Heier, Yasuda, Lynam, Eger & Weiskopf], 412  
**alkalosis**  
respiratory  
and neuromuscular effects of desflurane (CI) [Caldwell, Laster, Magorian, Heier, Yasuda, Lynam, Eger & Weiskopf], 412
- Acidosis**  
respiratory, *See under Acid-base equilibrium*
- Acute respiratory failure, See under Lung(s)**
- Adductor pollicis, See under Muscle, skeletal; Neuromuscular transmission**
- Adductor pollicis twitch response, See under Neuromuscular transmission**
- Adenosine, See under Pharmacology**
- Adenosine triphosphate, See under Metabolism; Pharmacology**
- $\alpha_2$ -Adrenergic agonists, See under Sympathetic nervous system**
- $\alpha_2$ -Adrenergic receptors, See under Receptors**
- $\beta$ -Adrenergic receptor blockade, See under Sympathetic nervous system**
- Aerosols**  
**intratracheal**  
delivery of salbutamol with metered-dose inhaler in narrow tracheal tubes and catheters (LR) [Taylor & Lerman], 360  
**intubation**  
delivery of salbutamol with metered-dose inhaler in narrow tracheal tubes and catheters (LR) [Taylor & Lerman], 360
- Age factors**  
**children**  
metered-dose inhaler delivery in narrow tubes to (LR) [Taylor & Lerman], 360  
**elderly**  
dose-finding study of intramuscular midazolam preanesthetic medication in (CI) [Wong, Fragen & Dunn], 675  
in pharmacokinetics of spinal bupivacaine (CI) [Veering, Burm, Vletter, van den Hoeven & Spierdijk], 250
- AIDS, See under Infection**
- Air embolism, See under Embolism**
- Air headache, See under Headache**
- Airway reactivity, See under Allergy, asthma**
- Alarm, See under Equipment**
- Albuterol, See under Lung(s), bronchodilator agents**
- Alcohol, See under Anesthetic techniques, spinal**
- Alfentanil, See under Anesthetics, intravenous**
- Alkalosis**  
respiratory, *See under Acid-base equilibrium*
- Allergy**  
**asthma**  
airway reactivity  
methylprednisone prevents, in dog model (LI) [Tobias, Sauder & Hirshman], 1115  
bronchoconstriction  
methylprednisone prevents, in dog model (LI) [Tobias, Sauder & Hirshman], 1115  
**latex**  
testing for, in patients with spina bifida is not recommended (CO) [Moneret-Vautrin & Laxenaire], 391  
testing for, in patients with spina bifida is not recommended (CO) [Slater & Mostello], 391
- Alpha adrenergic receptor blockers, See under Antagonists**
- Alpha-2 adrenergic agonists, See under Sympathetic nervous system**
- Alpha-2 adrenergic receptors, See under Sympathetic nervous system**
- Alpha-2 adrenoceptor agonists, See under Sympathetic nervous system**
- Alpha-2 agonists, See under Sympathetic nervous system, receptors**
- Alpha-adrenergic receptors, See under Sympathetic nervous system**
- American Academy of Pediatrics, See under Organizations**
- Ammonium chloride, See under Pharmacology**
- Amrinone, See under Pharmacology**
- Analgesia**  
**pain**  
experimental  
in humans, effect of medetomidine on (CI) [Kauppila, Kempainen, Tanila & Pertovaara], 3  
**patient-controlled**  
sleep apnea syndrome as contraindication for (CR) [VanDercar, Martinez & DeLisser], 623  
**postoperative**  
in animals (CO) [Hellyer, Kruse-Elliott, Meyer & Swanson], 202  
in animals (CO) [Wartier], 203  
**pregnancy-induced**  
naloxone-sensitive, in behavioral responses to colorectal distention (LR) [Iwasaki, Collins, Saito & Kerman-Hinds], 927  
with intrathecal  $\alpha_2$ -adrenergic agonists (LI) [Eisenach & Tong], 766
- Analgesics**  
**fentanyl**  
transmucosal  
in children with congenital heart disease (CI) [Goldstein-Dresner, Davis, Kretchman, Siewers, Certo & Cook], 28  
postoperative myocardial ischemia possibly masked by (CR) [Oden & Karagianes], 941  
**intrathecal**  
fentanyl  
-morphine combination, early respiratory depression following (CR) [Palmer], 1153  
morphine  
-fentanyl combination, early respiratory depression following (CR) [Palmer], 1153

- morphone
    - does not reduce MAC concentration of halothane in humans (CI) [Licina, Schubert, Tobin, Nicodemus & Spitzer], 660
  - intravenous**
    - butorphanol
      - and midazolam, comparison of sedative effects of (CI) [Dersh-witz, Rosow, DiBiase & Zaslavsky], 717
    - opioid
      - sleep apnea syndrome associated with (CR) [VanDercar, Mar-tinez & DeLisser], 623
  - mexiletine**
    - neuropathic pain can be relieved by (CR) [Tanelian & Brose], 949
  - opiate**
    - DADL
      - and alpha-2 interactions (LI) [Omote, Kitahata, Collins, Naka-tini & Nakagawa], 737
    - DAGO
      - and alpha-2 interactions (LI) [Omote, Kitahata, Collins, Naka-tini & Nakagawa], 737
    - DPDPE
      - and alpha-2 interactions (LI) [Omote, Kitahata, Collins, Naka-tini & Nakagawa], 737
    - morphine
      - and alpha-2 interactions (LI) [Omote, Kitahata, Collins, Naka-tini & Nakagawa], 737
  - opioid**
    - fentanyl
      - electroencephalographic quantitation of effect of, in compara-tive study (CI) [Scott, Cooke & Stanski], 34
      - induction with, and recovery profile after desflurane-nitrous oxide *versus* isoflurane-nitrous oxide (CI) [Ghoury, Bodner & White], 419
      - and midazolam, interaction of, in enflurane-anesthetized dogs (LI) [Schweiger, Hall & Hug], 1060
      - versus* lidocaine for lower extremity spasticity (CI) [Chabal, Ja-cobson & Schwid], 643
    - intraspinal
      - herpesvirus infections and (CO) [Beriault], 199
      - herpesvirus infections and (CO) [Crone, Conly & Zbitnew], 200
    - morphine
      - acute tolerance to (LI) [Kissin, Brown, Robinson & Bradley], 166
      - intrathecal, *versus* epidural bupivacaine (CI) [Abouleish, Ra-wal, Shaw, Lorenz & Rashad], 711
    - sufentanil
      - added bupivacaine, effects on analgesia during labor, and on incidence of instrumental deliveries (CI) [Vertommen, Van-dermeulen, Van Aken, Vaes, Soetens, Van Steenberge, Mourisse, Willaert, Noorduyn, Devlieger & Van Assche], 809
      - clonidine combined with, respiratory effects of, in humans (CI) [Bailey, Sperry, Johnson, Eldredge, East, East, Pace & Stan-ley], 43
      - electroencephalographic quantitation of effect of, in compara-tive study (CI) [Scott, Cooke & Stanski], 34
  - postoperative pain**
    - cerebrospinal fluid and (CI) [Hansdottir, Hedner, Woesten-borghs & Nordberg], 264
  - potency of, See under Potency**
  - sufentanil**
    - intrathecal, kinetics of (CI) [Hansdottir, Hedner, Woestenborghs & Nordberg], 264
- Analog scales, See under Recovery**  
**Anaphylaxis, See under Complications**
- Anatomy**
  - brachial plexus**
    - block of, in children, nerve stimulator for (CR) [Audenaert, Vickers & Burgess], 368
    - compression from malpositioned chest tube after thoracotomy (CR) [Mangar, Kelly, Holder & Camporesi], 780
  - colorectum**
    - distension
      - naloxone-sensitive, pregnancy-induced changes in behavioral responses to (LR) [Iwasaki, Collins, Saito & Kerman-Hinds], 927
  - spine**
    - cervical
      - in dwarfs (CO) [Audenaert], 1172
      - in dwarfs (CO) [Berkowitz, Raja & Bender], 1173- Anemia, See under Complications**
- Anesthesia**
  - cardiac**
    - barbiturate protection and (CI) [Zaidan, Klochany, Martin, Ziegler, Harless & Andrews], 406
    - barbiturate protection and (EV) [Todd, Hindman & Warner], 402
    - during isoflurane *versus* sufentanil during coronary artery bypass graft surgery (CI) [Leung, Goehner, O'Kelly, Hollenberg, Pineda, Cason, Mangano & SPI Research Group], 838
    - and perioperative myocardial ischemia monitoring (CI) [Gordon, Urban, O'Connor & Barash], 848
  - cardiovascular**
    - and cerebral blood flow during decreased systemic flow and pres-sure (LI) [Hindman, Funatsu, Harrington, Cutkomp, Miller, Todd & Tinker], 1096
    - emergence from, oral dexmedetomidine attenuates hemody-namic responses during (LI) [Proctor, Schmeling, Roerig, Kampine & Wartier], 108
    - during hypothermic cardiopulmonary bypass, sodium nitroprus-side infusion and (CI) [Rogers, Prough, Gravlee, Roy, Mills, Stump, Phipps, Royster & Taylor], 820
  - clinical**
    - role of the alpha-2 adrenoceptor agonists in (MI) [Maze & Tran-quilli], 581
  - complications, See under Complications**
  - general**
    - in patients with viral respiratory infections (EV) [Jacoby & Hirsh-man], 969
  - history**
    - the 29th Rovenstine Lecture: Clinical Challenges for the Anesthe-siologist (SA) [Stoelting], 1129
  - neonatal**
    - in truncus arteriosus (CR) [Wong, Baum & Sangwan], 378
  - obstetric**
    - instrumental delivery
      - incidence of, effects of addition of sufentanil to bupivacaine on (CI) [Vertommen, Vandermeulen, Van Aken, Vaes, Soe-tens, Van Steenberge, Mourisse, Willaert, Noorduyn, Dev-lieger & Van Assche], 809
      - effects of labetalol in pregnant ewes (LI) [Eisenach, Mandell & Dewan], 292
      - epidural anesthesia in, during magnesium sulfate infusion (LI) [Vincent, Chestnut, Sipes, Weiner, DeBruyn & Bleuer], 77
      - instrumental vaginal delivery, epidural anesthesia and (EV) [Chestnut], 805
      - intrathecal morphine *versus* epidural bupivacaine for (CI) [Abouleish, Rawal, Shaw, Lorenz & Rashad], 711

- and nonobstetric malpractice claims (CI) [Chadwick, Posner, Caplan, Ward & Cheney], 242  
 response of fetal heart rate to maternal administration of esmolol (CR) [Losasso, Muzzi & Cucchiara], 782
- orthopedic**  
 and axillary block for vascular insufficiency after repair of radial club hands in infant (CR) [Audenaert, Vickers & Burgess], 368
- outpatient**  
 for lithotripsy, alfentanil and ketamine combined with midazolam for (CI) [Monk, Rater & White], 1023
- pediatric**  
 preterm infants  
 anemia and postoperative apnea in former (CI) [Welborn, Hannallah, Luban, Fink & Ruttimann], 1003  
 and axillary block for vascular insufficiency after repair of radial club hands in infant (CR) [Audenaert, Vickers & Burgess], 368  
 effective dose and induction characteristics of propofol in (CI) [Hannallah, Baker, Casey, McGill, Broadman & Norden], 217  
 insufflation, for suture removal after cheiloplasty (CO) [Christenson & Presson], 382  
 intranasal midazolam, plasma concentrations following (CI) [Walbergh, Willis & Eckhert], 233  
 pharmacodynamics of high-dose vecuronium in (CI) [Sloan, Lerman & Bissonnette], 656  
 preinduction of, with rectally administered midazolam (CI) [Spear, Yaster, Berkowitz, Maxwell, Bender, Naclerio, Manolio & Nichols], 670  
 propofol requirements in, for infants and children (CI) [Westrin], 455  
 rectal methohexital in, causing apnea in patients with myelomeningocele (CR) [Yemen, Pullerits, Stillman & Hershey], 1139  
 single-blind study of combined pulse oximetry and capnography in (CI) [Coté, Rolf, Liu, Goudsouzian, Ryan, Zaslavsky, Gore, Todres, Vassallo, Polander & Alifimoff], 980  
 tracheal extubation in: halothane *versus* isoflurane in, anesthetized *versus* awake (CI) [Pounder, Blackstock & Steward], 653  
 transmucosal fentanyl in children with congenital heart disease (CI) [Goldstein-Dresner, Davis, Kretchman, Siewers, Certo & Cook], 28
- pediatric radiotherapy**  
 mechanical chin support during (CO) [Brock-Utne & Haddow], 381
- radiotherapy**  
 and modification of laryngeal mask airway (CO) [Wilson & Eastley], 1157
- regional**  
 complications  
 headache after epidural steroid injection (CR) [Katz, Lukin, Bridenbaugh & Gunzenhauser], 615
- requirements**  
 MAC  
 of desflurane in surgical patients (CI) [Rampil, Lockhart, Zwass, Peterson, Yasuda, Eger, Weiskopf & Damask], 429
- risks**  
 28th Rovenstine Lecture (SA) [Hornbein], 772
- thoracic**  
 bilateral upper lobe obstruction during, from single double-lumen tube (CO) [Brodsky & Mark], 1163  
 and cardiopulmonary effects of anterior mediastinal mass in dogs anesthetized with halothane (LI) [Johnson, Hurst, Cujec & Mayers], 725  
 for resection of bilateral pulmonary metastases intraoperative hypoxemia complicating (CR) [Antognini & Hanowell], 1137
- volatile**  
 isoflurane  
 the 29th Rovenstine Lecture: Clinical Challenges for the Anesthesiologist (SA) [Stoelting], 1129  
 for management of patient with Cornelia de Lange syndrome (CO) [Sargent], 1162  
 in patient with hypokalemic familial periodic paralysis undergoing cardiac surgery (CR) [Lema, Urzua, Moran & Canessa], 373  
 termination of hiccups occurring under (CO) [Bannon], 385
- Anesthesia care monitoring, See under Monitoring**
- Anesthetic loss**  
 percutaneous, *See under Skin*
- Anesthetic techniques**  
 axillary  
 for vascular insufficiency after repair of radial club hands in infant (CR) [Audenaert, Vickers & Burgess], 368
- brachial plexus block**  
 ropivacaine and bupivacaine compared for (CI) [Hickey, Hoffman & Ramamurthy], 639  
 standard dose of conduction anesthetic for, is excessive for patient with uremia (CO) [Gould], 634  
 standard dose of conduction anesthetic for, is excessive for patient with uremia (CO) [Lucas & Tsueda], 634
- continuous spinal**  
 microcatheters in, complication of (CO) [DeVera & Ries], 794
- epidural**  
 blood patch  
 in patient with HIV infection (CO) [Bevacqua & Slucky], 953  
 in patient with HIV infection (CO) [Gibbons], 953  
 prophylactic, complication following: spinal or subdural anesthesia? (CO) [Leighton], 1166  
 prophylactic, complication following: spinal or subdural anesthesia? (CO) [Leivers], 1166
- fentanyl**  
*versus* intravenous: a problem with small sample size (CO) [Ellis & Reisner], 795  
*versus* intravenous: a problem with small sample size (CO) [Slover & Palmer], 795  
 abscess associated with (CR) [Strong], 943  
 bupivacaine, *versus* intrathecal morphine in parturients (CI) [Abouleish, Rawal, Shaw, Lorenz & Rashad], 711  
 for complete sympathetic blockade (CO) [Peters], 633  
 for complete sympathetic blockade (CO) [Stevens], 632  
 and instrumental vaginal delivery (EV) [Chestnut], 805  
 level of block, and changes in human plasma catecholamine concentrations (CI) [Stevens, Artuso, Kao, Bray, Spitzer & Müller], 1029  
 during magnesium sulfate infusion (LI) [Vincent, Chestnut, Sipes, Weiner, DeBruyn & Bleuer], 77  
 opioid requirements for (CO) [deLeon-Casasola & Lema], 1158  
 opioid requirements for (CO) [Kreitzman & Samuels], 1159  
 opioids in, herpesvirus infections and (CO) [Crone, Conly & Zbitnew], 200  
 opioids, in herpesvirus infections and (CO) [Beriault], 199  
 sudden cardiac arrest during: venous air embolism (CO) [Williams, Tempelhoff, Modica & Jellish], 1171  
 sufentanil in, added to 0.125% bupivacaine, effects on analge-

- sia during labor and incidence of instrumental deliveries (CI) [Vertommen, Vandermeulen, Van Aken, Vaes, Soetens, Van Steenberge, Mourisse, Willaert, Noorduyn, Devlieger & Van Assche], 809
- suspected venous air embolism during (CR) [Jackson & Rauck], 190
- thermal balance and tremor patterns during (CI) [Hynson, Sessler, Glosten & McGuire], 680
- hypotension, induced**
- by desflurane, cerebral and systematic hemodynamic and metabolic effects of (I) [Milde & Milde], 513
- does arterial baroreflex play role in response to acute hypovolemia during? (CO) [Hoka], 953
- does arterial baroreflex play role in response to acute hypovolemia during? (CO) [Taneyama & Goto], 954
- during hypothermic cardiopulmonary bypass, and influence of nitroprusside on cerebral resistance vessels (CI) [Rogers, Prough, Gravlee, Roy, Mills, Stump, Phipps, Royster & Taylor], 820
- prolonged, renal function and hemodynamics during (CI) [Lesard & Trépanier], 860
- inhalational**
- and recovery following desflurane *versus* isoflurane (CI) [Ghouri, Bodner & White], 419
- insufflation**
- and mechanical chin support during radiotherapy (CO) [Brock-Utne & Haddow], 381
- for suture removal after cheiloplasty (CO) [Christenson & Presson], 382
- internal jugular vein cannulation**
- delayed onset of pneumothorax following (CO) [Dauber], 201
- guided by echocardiography (CR) [Troianos & Savino], 787
- inadvertent intraarterial placement of sheath introducer in (CO) [Stein & Shatz], 633
- precutaneous, new anatomic landmarks for (CO) [Oshima, Arai & Urabe], 1164
- intramuscular preanesthetic medication**
- dose-finding study of, in elderly (CI) [Wong, Fragen & Dunn], 675
- intrathecal**
- with  $\alpha_2$ -adrenergic agonists, site of hemodynamic effects of (LI) [Eisenach & Tong], 766
- intravenous cannulation**
- getting the bugs out (CO) [Jassy], 392
- prevention of blood spillage during (CO) [Fisher], 202
- jet ventilation**
- connecting jet stylet to jet injector (CO) [Benumof, Gaughan, Ozaki & Rusk], 963
- pulmonary artery catheterization**
- difficult, another reason for (CO) [Bergman & Jimenez], 962
- difficult, in tricuspid regurgitation (CO) [Baraka, Nawfal & Dahdah], 393
- nominal hemoptysis heralds pseudoaneurysm induced by (CR) [Yellin, Filler & Barnette], 370
- position-monitoring catheter for (CI) [Robertie, Johnston, Williamson, Dudas, Wallenhaupt & Ganz], 440
- rectal**
- methohexital
- causing apnea in patients with myelomeningocele (CR) [Yemen, Pullerits, Stillman & Hershey], 1139
- preinduction of anesthesia in children with, using midazolam (CI) [Spear, Yaster, Berkowitz, Maxwell, Bender, Naclerio, Manolio & Nichols], 670
- regional**
- autonomic nerve block
- radiowaves in denervation *versus* phenol neurolysis (CI) [Haynsworth & Noe], 459
- for vascular insufficiency after repair of radial club hands in infant (CR) [Audenaert, Vickers & Burgess], 368
- spinal**
- alcohol
- and dynamic flexometer for objective evaluation of spasticity (LR) [Chabal, Schwid & Jacobson], 609
- differential
- in chronic pain diagnosis and central poststroke pain relief (CR) [Crisolog, Neal, Brown, McDanal & Kissin], 184
- fentanyl
- and dynamic flexometer for objective evaluation of spasticity (LR) [Chabal, Schwid & Jacobson], 609
- morphine
- does not reduce MAC concentration of halothane in humans (CI) [Licina, Schubert, Tobin, Nicodemus & Spitzer], 660
- opioids
- and dynamic flexometer for objective evaluation of spasticity (LR) [Chabal, Schwid & Jacobson], 609
- prolongation
- of effect of tetracaine (LI) [Langerman, Golomb & Benita], 105
- with bupivacaine, effect of age on pharmacokinetics (CI) [Veer-ing, Burm, Vletter, van den Hoeven & Spierdijk], 250
- fatal massive air embolism during, for postatectomy (CR) [Vacanti & Lodh], 186
- fentanyl *versus* lidocaine in, for spasticity (CI) [Chabal, Jacobson & Schwid], 643
- morphine, *versus* epidural bupivacaine in parturients (CI) [Abouleish, Rawal, Shaw, Lorenz & Rashad], 711
- phantom limb pain induced by, intravenous calcitonin alleviates (CR) [Fiddler & Hindman], 187
- sufentanil in, kinetics of (CI) [Hansdottir, Hedner, Woestenberg & Nordberg], 264
- value of, in central pain (CO) [Day], 1167
- value of, in central pain (CO) [Kissin, McDanal & Crisologo], 1168
- sympathetic ganglion block**
- with phentolamine, diagnostic test for sympathetically maintained pain (CI) [Raja, Treede, Davis & Campbell], 691
- thoracic epidural**
- and hemorrhagic shock (LI) [Shibata, Yamamoto, Kobayashi & Murakami], 303
- tracheal extubation**
- in children: halothane *versus* isoflurane (CI) [Pounder, Blackstock & Steward], 653
- tracheal intubation**
- caution on use of routine depth of insertion of endotracheal tubes in (CO) [Cheney], 962
- caution on use of routine depth of insertion of endotracheal tubes in (CO) [Sosis & Harbut], 961
- and combined pulse oximetry and capnography in children (CI) [Coté, Rolf, Liu, Goudsouzian, Ryan, Zaslavsky, Gore, Todres, Vassallo, Polander & Alifimoff], 980
- difficult, aid in causes of (CO) [Sommer & Capan], 964
- transdermal**
- clonidine during perioperative period (CI) [Segal, Jarvis, Duncan, White & Maze], 220
- transtracheal jet ventilation**
- made easy (CO) [Delaney & Kaiser], 952
- in cases of difficult tracheal intubation (CO) [Cahen], 197

**Anesthetics**action of, *See under* Theories of anesthesia**epidural**

hydromorphone

requirements (CO) [deLeon-Casasola &amp; Lema], 1158

requirements (CO) [Kreitzman &amp; Samuels], 1159

opioids

and method to prevent tampering with infusion pump (CO) [Gudman], 1159

**gases**

nitrous oxide

abuse of, presenting as premature exhaustion of Sodasorb (CO) [Lang], 382

abuse of, presenting as premature exhaustion of Sodasorb (CO) [Yudenfreund-Sujka], 383

added to desflurane, MAC in (CI) [Rampil, Lockhart, Zwass, Peterson, Yasuda, Eger, Weiskopf &amp; Damask], 429

and desflurane or isoflurane, recovery profile after, in outpatients (CI) [Ghouri, Bodner &amp; White], 419

with desflurane, electroencephalographic effects of (CI) [Rampil, Lockhart, Eger, Yasuda, Weiskopf &amp; Cahalan], 434

and desflurane, neuromuscular effects of (CI) [Caldwell, Laster, Magorian, Heier, Yasuda, Lynam, Eger &amp; Weiskopf], 412

-isoflurane anesthesia, vecuronium blockade during, intraoperative hypothermia and (CI) [Heier, Caldwell, Sessler &amp; Miller], 815

in study of depression of ventilation by desflurane (CI) [Lockhart, Rampil, Yasuda, Eger &amp; Weiskopf], 484

in study of effect of parainfluenza infection on gas exchange and FRC response to anesthesia in sheep (LI) [Dueck, Prutow &amp; Richman], 1044

in study of kinetics of desflurane, isoflurane, and halothane in humans (CI) [Yasuda, Lockhart, Eger, Weiskopf, Johnson, Freire &amp; Fassoulaki], 489

for surgery of dura, subdural tension pneumocephalus arising after (CR) [Goodie &amp; Traill], 193

**intravenous**

alfentanil

for outpatient lithotripsy (CI) [Monk, Rater & White], 1023  
rational selection of, with regard to pharmacokinetics and pharmacodynamics (CI) [Shafer & Varvel], 53

etomidate

and somatosensory evoked potentials in cats (LI) [Samra &amp; Sorokin], 499

fentanyl

electroencephalographic quantitation of effect of, in comparative study (CI) [Scott, Cooke &amp; Stanski], 34

establish effective plasma concentration and achieve it at right time (CO) [Hug], 390

establish effective plasma concentration and achieve it at right time (CO) [Philbin, Rosow, Schneider, Koski &amp; D'Ambra], 389

establish effective plasma concentration and achieve it at right time (CO) [Stanley &amp; Bailey], 389

and midazolam, interaction of, in enflurane-anesthetized dogs [Schweiger, Hall &amp; Hug], 1060

rational selection of, with regard to pharmacokinetics and pharmacodynamics (CI) [Shafer &amp; Varvel], 53

in study of intraoperative hypothermia in vecuronium blockade during nitrous oxide-isoflurane anesthesia (CI) [Heier, Caldwell, Sessler &amp; Miller], 815

in study of methylprednisone prevention of airway hyperreactivity in dog model (LI) [Tobias, Sauder &amp; Hirshman], 1115

*versus* epidural: a problem with small sample size (CO) [Ellis & Reisner], 795*versus* epidural: a problem with small sample size (CO) [Slover & Palmer], 795

flunitrazepam

reversal of sedation produced by, coronary hemodynamics following (CI) [Marty, Nitenberg, Philip, Foul, Joyon &amp; Desmonts], 71

ketamine

for outpatient lithotripsy (CI) [Monk, Rater & White], 1023  
positive inotropic effect of, on cardiac contractility (LI) [Cook, Carton & Housmans], 880

midazolam

and fentanyl, interaction of, in enflurane-anesthetized dogs (LI) [Schweiger, Hall &amp; Hug], 1060

for outpatient lithotripsy (CI) [Monk, Rater &amp; White], 1023

morphine

nystagmus following (CO) [Stevens &amp; Sharrock], 390

opioid

selection of, pharmacokinetics and pharmacodynamics influencing (CI) [Shafer &amp; Varvel], 53

propofol

can a single ampule be used for multiple patients? (CO) [Downs, Haley &amp; Parent], 1156

can a single ampule be used for multiple patients? (CO) [Goode], 1156

effective dose and induction characteristics in unpremedicated children (CI) [Hannallah, Baker, Casey, McGill, Broadman &amp; Norden], 217

requirements in infants and children (CI) [Westrin], 455

and spontaneous movements: an EEG study (CI) [Borgeat, Des-sibourg, Popovic, Meier, Blanchard &amp; Schwander], 24

sufentanil

establish effective plasma concentration and achieve it at right time (CO) [Hug], 390

establish effective plasma concentration and achieve it at right time (CO) [Philbin, Rosow, Schneider, Koski &amp; D'Ambra], 389

establish effective plasma concentration and achieve it at right time (CO) [Stanley &amp; Bailey], 389

rational selection of, with regard to pharmacokinetics and pharmacodynamics (CI) [Shafer &amp; Varvel], 53

*versus* isoflurane during coronary artery bypass graft surgery (CI) [Leung, Goehner, O'Kelly, Hollenberg, Pineda, Cason, Mangano & SPI Research Group], 838

thiopental

protection by, and cardiac surgery (CI) [Zaidan, Klochany, Martin, Ziegler, Harless &amp; Andrews], 406

protection by, and cardiac surgery (EV) [Todd, Hindman &amp; Warner], 402

in study of methylprednisone prevention of airway hyperreactivity in dog model (LI) [Tobias, Sauder &amp; Hirshman], 1115

electroencephalographic quantitation of effect of, in comparative study (CI) [Scott, Cooke &amp; Stanski], 34

and hazards of reusing disposable syringes (CO) [Mangar], 791

and hazards of reusing disposable syringes (CO) [Sherry &amp; Davy], 790

and hazards of reusing disposable syringes (CO) [Swygert, Donica &amp; Ramsay], 790

and midazolam, interaction of, in enflurane-anesthetized dogs (LI) [Schweiger, Hall &amp; Hug], 1060

and spontaneous movements: an EEG study (CI) [Borgeat, Des-sibourg, Popovic, Meier, Blanchard &amp; Schwander], 24

**local**

**benzocaine**

- causing methemoglobinemia: recommended actions (CO) [Beutlich], 387
- causing methemoglobinemia: recommended actions (CO) [Severinghaus, Xu & Spellman], 385
- causing methemoglobinemia: recommended actions (CO) [Wachman], 387

**bupivacaine**

- addition of sufentanil to, effects on analgesia during labor and incidence of instrumental deliveries (CI) [Vertommen, Vandermeulen, Van Aken, Vaes, Soetens, Van Steenberge, Mourisse, Willaert, Noorduyn, Devlieger & Van Assche], 809
- effect of age on (CI) [Veering, Burm, Vletter, van den Hoeven & Spierdijk], 250
- electrophysiologic effects of, on guinea pig papillary muscles (LI) [Sun & Rosen], 893
- epidural, *versus* intrathecal morphine (CI) [Abouleish, Rawal, Shaw, Lorenz & Rashad], 711
- and ropivacaine, compared for brachial plexus block (CI) [Hickey, Hoffman & Ramamurthy], 639
- toxicity, hexamethonium and midazolam terminate (LI) [Bernards & Artru], 89
- ventricular conduction and rhythm disorders and, hyponatremia and hyperkalemia enhancing (CO) [Moore], 383
- ventricular conduction and rhythm disorders and, hyponatremia and hyperkalemia enhancing (CO) [Timour, Freysz, Mazze, Couzon, Bertrix & Faucon], 384

**chloroprocaine**

- in study of plasma catecholamine concentrations during epidural anesthesia (CI) [Stevens, Artuso, Kao, Bray, Spitzer & Müller], 1029
- thermal balance and tremor patterns during anesthesia with (CI) [Hynson, Sessler, Glosten & McGuire], 680

**cocaine**

- abuse of, thrombocytopenia and (CR) [Orser], 195
- prolongation of effect of (CO) [Herschman & Aaron], 631

**lidocaine**

- during magnesium sulfate infusion (LI) [Vincent, Chestnut, Sipes, Weiner, DeBruyn & Bleuer], 77
- spinal block induced by, can relieve central poststroke pain (CR) [Crisologo, Neal, Brown, McDanal & Kissin], 184
- suppresses tonic neural injury discharge (LR) [Tanelian & MacIver], 934
- versus* fentanyl for lower extremity spasticity (CI) [Chabal, Jacobson & Schwid], 643

**ropivacaine**

- and bupivacaine, compared for brachial plexus block (CI) [Hickey, Hoffman & Ramamurthy], 639

**tetracaine**

- prolongation of effect of, in spinal anesthesia (LI) [Langerman, Golomb & Benita], 105
- neuropathic pain can be relieved by (CR) [Tanelian & Brose], 949
- as new mode of nerve block (EV) [Kendig & Courtney], 207
- veratridine to block, in C-fibers (LI) [Schneider, Datta & Strichartz], 270

**rectal**

**midazolam**

- in preinduction of anesthesia in children (CI) [Spear, Yaster, Berkowitz, Maxwell, Bender, Naclerio, Manolio & Nichols], 670

**volatile**

**desflurane**

- alteration of left ventricular diastolic function by, in autonomic nervous system blockade (LI) [Pagel, Kampine, Schmeling & Warltier], 1103
- cerebral uptake and elimination of, from rabbit brain (LI) [Lockhart, Cohen, Yasuda, Freire, Litt & Eger], 575
- depression of ventilation by (CI) [Lockhart, Rampil, Yasuda, Eger & Weiskopf], 484
- effects of, on systemic and regional circulation (LI) [Merin, Bernard, Doursout, Cohen & Chelly], 568
- electroencephalographic effects of, in humans (CI) [Rampil, Lockhart, Eger, Yasuda, Weiskopf & Cahalan], 434
- and hyperventilation, canine cerebral circulation and (LI) [Lutz, Milde & Milde], 504
- influence of, on myocardial contractility (LI) [Pagel, Kampine, Schmeling & Warltier], 900
- kinetics of, in humans (CI) [Yasuda, Lockhart, Eger, Weiskopf, Johnson, Freire & Fassoulaki], 489
- MAC of (CI) [Rampil, Lockhart, Zwass, Peterson, Yasuda, Eger, Weiskopf & Damask], 429
- neuromuscular effects of (CI) [Caldwell, Laster, Magorian, Heier, Yasuda, Lynam, Eger & Weiskopf], 412
- nitrous oxide, recovery profile after, in outpatients (CI) [Ghouri, Bodner & White], 419
- percutaneous loss, in humans (CI) [Fassoulaki, Lockhart, Freire, Yasuda, Eger, Weiskopf & Johnson], 479
- role of, in anesthesia (EV) [Saidman], 399
- in surgical patients, emergence from (CI) [Smiley, Ornstein, Matteo, Pantuck & Pantuck], 425
- systemic and coronary hemodynamic actions of, in comparative study in chronically instrumented dog (LI) [Pagel, Kampine, Schmeling & Warltier], 539
- triggers malignant hyperthermia in swine (LI) [Wedel, Jaizzo & Milde], 508
- use of, for hypotension (LI) [Milde & Milde], 513

**enflurane**

- and cardiac length-tension relation (LI) [Baele & Housmans], 281
- depresses peripheral vagal motor pathway in isolated canine tracheal smooth muscle (LI) [Brichart, Gunst, Warner & Rehder], 325
- effects of, on calcium current in isolated canine ventricular cells (LI) [Bosnjak, Supan & Rusch], 340
- effects of, on hepatic and renal circulations in chronically instrumented dogs (LI) [Bernard, Doursout, Wouters, Hartley, Cohen, Merin & Chelly], 298
- effects of, on L- and T-type calcium channel currents in canine cardiac Purkinje fibers (LI) [Eskinder, Rusch, Supan, Kampine & Bosnjak], 919
- effects of, on oxygen supply and demand in isolated hearts (LI) [Stowe, Marijic, Bosnjak & Kampine], 1087
- effects on resting membrane potential (LI) [MacIver & Kendig], 83
- and stimulus-secretion coupling (LI) [Kress, Müller, Eisert, Gilge, Tas & Koschel], 309
- in study of closed-loop infusion of atracurium (CI) [O'Hara, Derbyshire, Overdyk, Bogen & Marshall], 258
- systemic and coronary hemodynamic actions of, in comparative study in chronically instrumented dog (LI) [Pagel, Kampine, Schmeling & Warltier], 539

**halothane**

- alteration of left ventricular diastolic function by, in autonomic

- nervous system blockade (LI) [Pagel, Kampine, Schmeling & Warltier], 1103
- and cardiac length-tension relation (LI) [Baele & Housmans], 281
- cerebral uptake and elimination of, from rabbit brain (LI) [Lockhart, Cohen, Yasuda, Freire, Litt & Eger], 575
- and delayed after depolarizations in myocytes (LI) [Freeman & Li], 146
- depresses calcium channel blocker binding to bovine cardiac sarcolemma (LI) [Drenger, Quigg & Blanck], 155
- depresses peripheral vagal motor pathway in isolated canine tracheal smooth muscle (LI) [Brichart, Gunst, Warner & Rehder], 325
- effects of, on calcium current in isolated canine ventricular cells (LI) [Bosnjak, Supan & Rusch], 340
- effects of, on L- and T-type calcium channel currents in canine cardiac Purkinje fibers (LI) [Eskinder, Rusch, Supan, Kampine & Bosnjak], 919
- effects of, on oxygen supply and demand in isolated hearts (LI) [Stowe, Marijic, Bosnjak & Kampine], 1087
- effects on resting membrane potential (LI) [MacIver & Kendig], 83
- increases pulmonary artery endothelial cell sensitivity to oxidant-mediated injury (LI) [Shayevitz, Varani, Ward & Knight], 1067
- influence of, on benzodiazepine receptor binding (LI) [Hansen, Warner, Todd, Baker & Jensen], 97
- kinetics of, in humans (CI) [Yasuda, Lockhart, Eger, Weiskopf, Johnson, Freire & Fassoulaki], 489
- MAC, intrathecal morphine and (CI) [Licina, Schubert, Tobin, Nicodemus & Spitzer], 660
- mobilization of intracellular Ca<sup>2+</sup> induced by, in hepatocytes from swine with malignant hyperthermia (LI) [Iaizzo, Seewald, Olsen, Wedel, Chapman, Berggren, Eichinger & Powis], 531
- myocardial sensitization by (LI) [Hayashi, Sumikawa, Yamatodani, Kamibayashi, Kuro & Yoshiya], 134
- percutaneous loss, in humans (CI) [Fassoulaki, Lockhart, Freire, Yasuda, Eger, Weiskopf & Johnson], 479
- potentiates antitumor activity of gamma-interferon (LI) [Rudnick, Stevenson, Hall, Espinoza-Delgado, Stevenson & Longo], 115
- and stimulus-secretion coupling (LI) [Kress, Müller, Eisert, Gilge, Tas & Koschel], 309
- in study of closed-loop infusion of atracurium (CI) [O'Hara, Derbyshire, Overdyk, Bogen & Marshall], 258
- in study of effect of parainfluenza infection on gas exchange and FRC response to anesthesia in sheep (LI) [Dueck, Prutow & Richman], 1044
- systemic and coronary hemodynamic actions of, in comparative study in chronically instrumented dog (LI) [Pagel, Kampine, Schmeling & Warltier], 539
- versus* isoflurane, and human mesenteric circulation (CI) [Jacob, Boudaoud, Payen, Rabarg, Sarfati, Gossot, Villiers & Evrin], 699
- versus* isoflurane, for tracheal extubation in children (CI) [Pounder, Blackstock & Steward], 653
- isoflurane
- alteration of left ventricular diastolic function by, in autonomic nervous system blockade (LI) [Pagel, Kampine, Schmeling & Warltier], 1103
- amrinone reverses cardiac depression by (LI) [Rooney, Stowe, Marijic, Bosnjak & Kampine], 559
- and cardiac length-tension relation (LI) [Baele & Housmans], 281
- cerebral uptake and elimination of, from rabbit brain (LI) [Lockhart, Cohen, Yasuda, Freire, Litt & Eger], 575
- coronary collateral blood flow and (LI) [Hartman, Kampine, Schmeling & Warltier], 120
- depresses peripheral vagal motor pathway in isolated canine tracheal smooth muscle (LI) [Brichart, Gunst, Warner & Rehder], 325
- and desflurane, dose-response relationships of pancuronium and succinylcholine during anesthesia with, compared (CI) [Caldwell, Laster, Magorian, Heier, Yasuda, Lynam, Eger & Weiskopf], 412
- and desflurane, in comparative study of effects on systemic and regional circulation (LI) [Merin, Bernard, Doursout, Cohen & Chelly], 568
- discontinuation and vecuronium reversal (CI) [Baurain, d'Hollander, Melot, Dernovoi & Barvais], 474
- effects of, on calcium current in isolated canine ventricular cells (LI) [Bosnjak, Supan & Rusch], 340
- effects of, on hepatic and renal circulations in chronically instrumented dogs (LI) [Bernard, Doursout, Wouters, Hartley, Cohen, Merin & Chelly], 298
- effects of, on L- and T-type calcium channel currents in canine cardiac Purkinje fibers (LI) [Eskinder, Rusch, Supan, Kampine & Bosnjak], 919
- effects of, on oxygen supply and demand in isolated hearts (LI) [Stowe, Marijic, Bosnjak & Kampine], 1087
- effects on resting membrane potential (LI) [MacIver & Kendig], 83
- hypotension induced by, renal function and hemodynamics during (CI) [Lessard & Trépanier], 860
- increases pulmonary artery endothelial cell sensitivity to oxidant-mediated injury (LI) [Shayevitz, Varani, Ward & Knight], 1067
- influence of, on benzodiazepine receptor binding (LI) [Hansen, Warner, Todd, Baker & Jensen], 97
- influence of, on myocardial contractility (LI) [Pagel, Kampine, Schmeling & Warltier], 900
- intracoronary causes marked vasodilation in canine hearts (LI) [Crystal, Kim, Czinn, Salem, Mason & Abdel-Latif], 757
- kinetics of, in humans (CI) [Yasuda, Lockhart, Eger, Weiskopf, Johnson, Freire & Fassoulaki], 489
- and myocardial ischemia (CI) [Leung, Goehner, O'Kelly, Hollenberg, Pineda, Cason, Mangano & SPI Research Group], 838
- depresses calcium channel blocker binding to bovine cardiac sarcolemma (LI) [Drenger, Quigg & Blanck], 155
- nitrous oxide anesthesia, vecuronium blockade during intraoperative hypothermia and (CI) [Heier, Caldwell, Sessler & Miller], 815
- nitrous oxide, recovery profile after, in outpatients (CI) [Ghouri, Bodner & White], 419
- percutaneous loss, in humans (CI) [Fassoulaki, Lockhart, Freire, Yasuda, Eger, Weiskopf & Johnson], 479
- requirements for hysterectomy, effect of intravenously administered dexmedetomidine on (CI) [Aho, Lehtinen, Erkola, Kallio & Korttila], 997
- and stimulus-secretion coupling (LI) [Kress, Müller, Eisert, Gilge, Tas & Koschel], 309
- in study of closed-loop infusion of atracurium (CI) [O'Hara, Derbyshire, Overdyk, Bogen & Marshall], 258
- in surgical patients, emergence from (CI) [Smiley, Ornstein, Matteo, Pantuck & Pantuck], 425
- systemic and coronary hemodynamic actions of, in comparative study in chronically instrumented dog (LI) [Pagel, Kampine, Schmeling & Warltier], 539

- for treatment of refractory arterial and intracranial hypertension in intensive care unit (CR) [Miller, Drummond & Lamond], 946
- vasodilation induced by, minimally increases cutaneous heat loss (CI) [Sessler, McGuire, Moayeri & Hynson], 226
- versus* adenosine, and steal-prone coronary circulation in chronically instrumented dogs (LI) [Hartman, Kampine, Schmeling & Warltier], 744
- versus* halothane, and human mesenteric circulation (CI) [Jacob, Boudaoud, Payen, Rabarg, Sarfati, Gossot, Villiers & Evrin], 699
- versus* halothane, for tracheal extubation in children (CI) [Pounder, Blackstock & Steward], 653
- methoxyflurane**
- and stimulus-secretion coupling (LI) [Kress, Müller, Eisert, Gilge, Tas & Koschel], 309
- cardiac conduction with diltiazem and (LI) [Gallenberg, Stowe, Marijic, Kampine & Bosnjak], 519
- dogs anesthetized with, interaction between midazolam and fentanyl in (LI) [Schweiger, Hall & Hug], 1060
- no evidence of tolerance to, in swine (LI) [Rampil, Laster, Dwyer, Taheri & Eger], 889
- Animals**
- dogs**
- anesthetics and calcium current in (LI) [Bosnjak, Supan & Rusch], 340
- dexmedetomidine and emergence from anesthesia in (LI) [Proctor, Schmeling, Roerig, Kampine & Warltier], 108
- phlebotomy following aortic cross-clamping (LI) [Mutch, Thomson, Teskey, Thiessen & Rosenbloom], 320
- transesophageal echocardiography in (CO) [Bashein & Martin], 958
- transesophageal echocardiography in (CO) [Kerber & Vandenberg], 959
- guinea pig**
- adult**
- electrophysiology effects of bupivacaine on (LI) [Sun & Rosen], 893
- fetal**
- electrophysiology effects of bupivacaine on (LI) [Sun & Rosen], 893
- neonatal**
- electrophysiological effects of bupivacaine on (LI) [Sun & Rosen], 893
- amrinone reverses cardiac depression by isoflurane in (LI) [Rooney, Stowe, Marijic, Bosnjak & Kampine], 559
- cardiac conduction with diltiazem and volatile anesthetics in (LI) [Gallenberg, Stowe, Marijic, Kampine & Bosnjak], 519
- rats**
- PC12 cell line
- volatile anesthetics and stimulus-secretion coupling in (LI) [Kress, Müller, Eisert, Gilge, Tas & Koschel], 309
- swine**
- purebred Pietrain
- desflurane triggers malignant hyperthermia in (LI) [Wedel, Iazzo & Milde], 508
- with malignant hyperthermia, Ca<sup>2+</sup> mobilization in hepatocytes from (LI) [Iazzo, Seewald, Olsen, Wedel, Chapman, Berggren, Eichinger & Powis], 531
- postoperative analgesia in (CO) [Hellyer, Kruse-Elliott, Meyer & Swanson], 202
- postoperative analgesia in (CO) [Warltier], 203
- Anoxia, See under Complications**
- Antagonists**
- alpha adrenergic receptor blockers**
- phenolamine
- in diagnostic test for sympathetically maintained pain (CI) [Raja, Treede, Davis & Campbell], 691
- antimuscarinic**
- physostigmine
- for reversal of central anticholinergic syndrome (CR) [Grum & Osborne], 191
- benzodiazepines**
- Ro-15-1788 (flumazenil)
- influence of inhalational anesthetics on (LI) [Hansen, Warner, Todd, Baker & Jensen], 97
- flumazenil**
- and interaction between midazolam and fentanyl in enflurane-anesthetized dogs (LI) [Schweiger, Hall & Hug], 1060
- miscellaneous**
- flumazenil
- and coronary hemodynamics (CI) [Marty, Nitenberg, Philip, Foul, Joyon & Desmots], 71
- naloxone**
- in study of interaction of midazolam and fentanyl in enflurane-anesthetized dogs (LI) [Schweiger, Hall & Hug], 1060
- neuromuscular relaxants**
- neostigmine
- in study of isoflurane discontinuation and vecuronium reversal (CI) [Baurain, d'Hollander, Melot, Dernovoi & Barvais], 474
- in vecuronium-induced neuromuscular block (CO) [Bentley & Lahet], 1169
- in vecuronium-induced neuromuscular block (CO) [Magorian, Caldwell, Miller & Lymans], 1170
- opioid**
- naloxone
- sensitive, pregnancy-induced changes in behavioral responses to colorectal distention (LR) [Iwasaki, Collins, Saito & Kerman-Hinds], 927
- and sedation with butorphanol and midazolam (CI) [Dershwitz, Rosow, DiBiase & Zaslavsky], 717
- Ro 15-1788**
- and interaction between midazolam and fentanyl in enflurane-anesthetized dogs (LI) [Schweiger, Hall & Hug], 1060
- β-adrenergic**
- propranolol
- airway hyperreactivity induced by, methylprednisone prevents, in dog model (LI) [Tobias, Sauder & Hirshman], 1115
- Anticholinergics, See under Parasympathetic nervous system**
- Anticonvulsants**
- carbamazepine**
- neuropathic pain can be relieved by (CR) [Tanelian & Brose], 949
- Antidotes**
- cyanide**
- hydroxocobalamin
- hemodynamic effects of, in conscious dogs (LI) [Riou, Gérard, Drieu La Rochelle, Bourdon, Berdeaux & Giudicelli], 552
- Antimuscarinic antagonists, See under Antagonists**
- Anxiety, See under Complications**
- Aortic cross-clamping, See under Blood pressure**
- Apnea, See under Complications; Ventilation**
- Arrhythmia(s), See under Complications; Heart**
- Arteries**
- coronary**
- steal
- isoflurane and (LI) [Hartman, Kampine, Schmeling & Warltier], 120
- and enhanced coronary collateral blood flow and isoflurane (LI) [Hartman, Kampine, Schmeling & Warltier], 744



- pulmonary  
  endothelial cell sensitivity  
  to oxidant-mediated injury, influence of halothane and isoflurane on (LI) [Shayevitz, Varani, Ward & Knight], 1067
- Arytenoid dislocation, See under Complications**
- Asthma, See under Allergy**
- Ataractics**  
  phenothiazines  
  trifluoperazine  
    halothane potentiates antitumor activity of gamma-interferon and mimics (LI) [Rudnick, Stevenson, Hall, Espinoza-Delgado, Stevenson & Longo], 115
- Atelectasis, See under Lung(s)**
- ATP, See under Metabolism**
- Atracurium, See under Muscle relaxants; Neuromuscular relaxants**
- Atrial rate, See under Heart**
- Atrial septal defect, See under Heart**
- Atrial septal defect repair, See under Surgery, cardiac**
- Atrioventricular block, See under Heart**
- Atrioventricular conduction interval, See under Heart**
- Automatic implantable cardioverter defibrillator, See under Heart**
- Autonomic nerve block, See under Anesthetic techniques, regional; Nerve(s), block**
- Autonomic nervous system, See under Sympathetic nervous system**
- Autoradiography, See under Measurement techniques**
- B**
- Balanced anesthesia, See under Anesthetic techniques**
- Ballistocardiography, See under Surgery, cardiac**
- Baroreceptor reflexes, See under Blood pressure**
- Basilar skull fracture, See under Complications**
- Basophils, See under Histamine**
- Benzocaine, See under Anesthetics, local**
- Benzodiazepines, See under Hypnotics**
- Beta-adrenergic agonists, See under Sympathetic nervous system**
- Beta-adrenergic antagonists, See under Sympathetic nervous system**
- Blood**  
  **blood-brain barrier**  
    and central anticholinergic syndrome following glycopyrrrolate (CR) [Grum & Osborne], 191
- coagulation**  
    protamine  
      cardiotoxic agent with negative inotropism (CO) [Lee & Lin], 635  
      and cardiopulmonary bypass (CI) [Frankville, Harper, Lake & Johns], 988  
      and protein C deficiency as cause of pulmonary embolism in perioperative period (CR) [Sternberg, Bailey, Lazarchick & Brahen], 364  
      and therapy of protamine-induced pulmonary hypertension (LI) [Nuttall, Murray & Bowie], 138
- desmopressin**  
    hemodynamic consequences of, after cardiopulmonary bypass (CI) [Frankville, Harper, Lake & Johns], 988
- eicosanoids**  
    in therapy of protamine-heparin-induced pulmonary hypertension (LI) [Nuttall, Murray & Bowie], 138
- flow**  
    reversal of, in internal jugular vein (CO) [Yonei & Sari], 634
- hemodilution**  
    acute normovolemic  
      and splanchnic oxygenation (LI) [Nöldge, Priebe, Bohle, Buttler & Geiger], 908
- hemodynamic response**  
    level of epidural block  
      plasma catecholamine concentrations and (CI) [Stevens, Artuso, Kao, Bray, Spitzer & Müller], 1029
- hemodynamics**  
    and consequences of desmopressin after cardiopulmonary bypass (CI) [Frankville, Harper, Lake & Johns], 988  
    control of, magnesium, anesthesia and (EV) [Zaloga & Eisenach], 1  
    effect of intravenously administered dexmedetomidine on, in patients undergoing hysterectomy (CI) [Aho, Lehtinen, Erkola, Kallio & Korttila], 997
- heparin**  
    pulmonary hypertension induced by, therapy of (LI) [Nuttall, Murray & Bowie], 138
- hypovolemia**  
    acute, during induced hypotension, does arterial baroreflex play role in response to? (CO) [Hoka], 953  
    acute, during induced hypotension, does arterial baroreflex play role in response to? (CO) [Taneyama & Goto], 954
- platelets**  
    low count, in cocaine abuse (CR) [Orser], 195
- protamine**  
    pulmonary hypertension induced by, therapy of (LI) [Nuttall, Murray & Bowie], 138
- systemic vascular resistance**  
    and consequences of desmopressin after cardiopulmonary bypass (CI) [Frankville, Harper, Lake & Johns], 988
- thrombocytopenia**  
    and cocaine abuse (CR) [Orser], 195
- transfusion, See Transfusion**
- Blood patch, See under Anesthetic techniques, epidural**
- Blood pressure**  
  **aortic cross-clamping**  
    phlebotomy following aortic cross-clamping in (LI) [Mutch, Thomson, Teskey, Thiessen & Rosenbloom], 320
- arterial**  
    monitoring  
      and artifactual hypertension due to transducer cable malfunction (CR) [Raines, Hogue, Wickens, Welch & Risk], 1149
- baroreceptor reflexes**  
    in response to acute hypovolemia during induced hypotension (CO) [Hoka], 953  
    in response to acute hypovolemia during induced hypotension (CO) [Taneyama & Goto], 954
- drug effects**  
    in desflurane-induced hypotension in dogs (LI) [Milde & Milde], 513
- hypertension**  
    following resection of cerebral arteriovenous malformation (CR) [Miller, Drummond & Lamond], 946  
    assessment of, with oral clonidine preanesthetic medication and intravenous ephedrine (CI) [Nishikawa, Kimura, Taguchi & Dohi], 705  
    erroneous measurements of, with noninvasive blood pressure monitor (CO) [Eames], 967  
    erroneous measurements of, with noninvasive blood pressure monitor (CO) [Ehlers & Grabenbauer], 967
- See also under Monitoring**
- Blood vessels**  
  **vasoconstriction**  
    in assessment of thermal balance and tremor patterns during epidural anesthesia (CI) [Hynson, Sessler, Glosten & McGuire], 680

- in operating room, isoflurane-induced vasodilation and (CI) [Sessler, McGuire, Moayeri & Hynson], 226
- vasodilation**
- isoflurane-induced, and heat loss (CI) [Sessler, McGuire, Moayeri & Hynson], 226
- marked, intracoronary isoflurane causes, in canine hearts (LI) [Crystal, Kim, Czinn, Salem, Mason & Abdel-Latif], 757
- Book reviews**
- Borel, C., *The Respiratory Muscles. Problems in Respiratory Care*, 799
- Ellis, J. E., *Anesthesiology and Vascular Surgery*, 636
- Helfaer, M. A., *Anesthesia for Plastic and Reconstructive Surgery*, 1176
- Kirsch, J. R., *Clinical Anesthesia in Neurosurgery*, 1175
- Leahy, J. J., *The History of Anaesthesia*, 798
- Pandit, S. K., *Anesthesia for Ambulatory Surgery*, 968
- Parker, S. D., *Clinical Applications of Ventilatory Support*, 798
- Saint-Maurice, C., and Schulte-Steinberg, O., *Regional Anaesthesia in Children*, 205
- Sieber, F. E., *Raised Intracranial Pressure: A Clinical Guide*, 799
- Tobias, J. D., *Anesthetic Management of Difficult and Routine Pediatric Patients*, 798
- Ulatowski, J. A., *Spinal Cord Injuries: Anesthetic and Associated Care*, 1176
- White, P.F. (ed.), *Outpatient Anesthesia*, 205
- Borel, C.**
- The Respiratory Muscles. Problems in Respiratory Care* (BR), 799
- Brachial plexus, See under Anatomy**
- Brachial plexus block, See under Anesthetic techniques**
- Bradycardia, See under Complications**
- Brain**
- arteriovenous malformation**
- refractory arterial and intracranial hypertension following resection of (CR) [Miller, Drummond & Lamond], 946
- autoregulation**
- in alpha-stat and pH-stat management are eliminated during periods of decreased systemic flow and pressure (LI) [Hindman, Funatsu, Harrington, Cutkomp, Miller, Todd & Tinker], 1096
- blood flow**
- in alpha-stat and pH-stat management are eliminated during periods of decreased systemic flow and pressure (LI) [Hindman, Funatsu, Harrington, Cutkomp, Miller, Todd & Tinker], 1096
- in desflurane-induced hypotension in dogs (LI) [Milde & Milde], 513
- epinephrine and acid-base status during cardiopulmonary resuscitation (LI) [Lindner, Ahnefeld, Bowdler & Prengel], 333
- during hypothermic cardiopulmonary bypass, sodium nitroprusside infusion and (CI) [Rogers, Prough, Gravlee, Roy, Mills, Stump, Phipps, Royster & Taylor], 820
- and phlebotomy following aortic cross-clamping (LI) [Mutch, Thomson, Teskey, Thiessen & Rosenbloom], 320
- in response to hyperventilation during desflurane anesthesia (LI) [Lutz, Milde & Milde], 504
- carbon dioxide response**
- in alpha-stat and pH-stat management are eliminated during periods of decreased systemic flow and pressure (LI) [Hindman, Funatsu, Harrington, Cutkomp, Miller, Todd & Tinker], 1096
- in response to hyperventilation during desflurane anesthesia (LI) [Lutz, Milde & Milde], 504
- cerebral dysautoregulation**
- following resection of cerebral arteriovenous malformation (CR) [Miller, Drummond & Lamond], 946
- electroencephalogram**
- in study of effects of desflurane in humans (CI) [Rampil, Lockhart, Eger, Yasuda, Weiskopf & Cahalan], 434
- electroencephalography**
- in study of use of desflurane for hypotension (LI) [Milde & Milde], 513
- hippocampal slice**
- anesthetic effects on (LI) [MacIver & Kendig], 83
- hyperpolarization**
- anesthetic effects on (LI) [MacIver & Kendig], 83
- hypothalamus**
- and isoflurane-induced vasodilation and heat loss (CI) [Sessler, McGuire, Moayeri & Hynson], 226
- and thermal balance and tremor patterns during epidural anesthesia (CI) [Hynson, Sessler, Glosten & McGuire], 680
- intracranial pressure**
- in desflurane-induced hypotension in dogs (LI) [Milde & Milde], 513
- following resection of cerebral arteriovenous malformation (CR) [Miller, Drummond & Lamond], 946
- in response to hyperventilation during desflurane anesthesia (LI) [Lutz, Milde & Milde], 504
- in subdural tension pneumocephalus arising after opening of dura (CR) [Goodie & Traill], 193
- metabolism**
- in desflurane-induced hypotension in dogs (LI) [Milde & Milde], 513
- oxygen consumption**
- in desflurane-induced hypotension in dogs (LI) [Milde & Milde], 513
- during hypothermic cardiopulmonary bypass, sodium nitroprusside infusion and (CI) [Rogers, Prough, Gravlee, Roy, Mills, Stump, Phipps, Royster & Taylor], 820
- perfusion pressure breakthrough**
- following resection of cerebral arteriovenous malformation (CR) [Miller, Drummond & Lamond], 946
- protection**
- stroke
- and cardiac surgery (CI) [Zaidan, Klochany, Martin, Ziegler, Harless & Andrews], 406
- and cardiac surgery (EV) [Todd, Hindman & Warner], 402
- resting potential**
- anesthetic effects on (LI) [MacIver & Kendig], 83
- tension pneumocephalus**
- intraoperative, arising after opening of dura (CR) [Goodie & Traill], 193
- Bronchoconstriction, See under Allergy, asthma**
- Bronchodilator agents, See under Lung(s)**
- Bronchoscope, See under Equipment**
- Bronchospasm, See under Complications**
- Bupivacaine, See under Anesthetics, local; Pharmacokinetics**
- Butorphanol, See under Analgesics, intravenous**

C

- Ca<sup>2+</sup>, *See under Ions, calcium*
- Calcitonin, *See under Hormones*
- Calcium, *See under Ions*
- Calcium channel blockers, *See under Ions, calcium*
- Calcium channel blocking drugs, *See under Pharmacology*
- Calcium influx, *See under Ions, calcium*
- Calcium transients, *See under Ions, calcium*
- Calculator, *See under Equipment*

- Calmodulin inhibitors, See under Ataractics, phenothiazines**
- Capnography, See under Monitoring**
- Carbamazepine, See under Anticonvulsants**
- Carbon dioxide**
- absorption**
    - and nitrous oxide abuse presenting as premature exhaustion of Sodasorb (CO) [Lang], 382
    - and nitrous oxide abuse presenting as premature exhaustion of Sodasorb (CO) [Yudenfreund-Sujka], 383
  - hypocapnia**
    - response of canine cerebral circulation to hyperventilation during desflurane anesthesia (LI) [Lutz, Milde & Milde], 504
  - normocapnia**
    - response of canine cerebral circulation to hyperventilation during desflurane anesthesia (LI) [Lutz, Milde & Milde], 504
    - response, in depression of ventilation by desflurane (CI) [Lockhart, Rampil, Yasuda, Eger & Weiskopf], 484
- Carbon dioxide embolism, See under Embolism**
- Cardiac arrest, See under Heart**
- Cardiac cellular electrophysiology, See under Heart**
- Cardiac complications, See under Complications**
- Cardiac compression, See under Heart**
- Cardiac contractility, See under Heart**
- Cardiac depression, See under Complications; Heart**
- Cardiac pacing, See under Heart**
- Cardiac surgery, See under Surgery**
- Cardiopulmonary bypass, See under Surgery, cardiac**
- Cardiopulmonary resuscitation, See under Heart**
- Cardiovascular anesthesia, See under Anesthesia**
- Cardiovascular system, See under Heart**
- Cardiovascular toxicity, See under Toxicity**
- Catecholamines, See under Sympathetic nervous system**
- Catheters, See under Equipment**
- Cells**
- tumor**
    - cytotoxicity**
      - halothane potentiates antitumor activity of gamma-interferon (LI) [Rudnick, Stevenson, Hall, Espinoza-Delgado, Stevenson & Longo], 115
- Central anticholinergic syndrome, See under Complications; Sympathetic nervous system, parasympathetic nervous system**
- Cerebral arteriovenous malformation, See under Brain**
- Cerebral blood flow, See under Brain**
- Cerebrospinal fluid**
- and plasma pharmacokinetics of sufentanil after intrathecal administration (CI) [Hansdottir, Hedner, Woestenborghs & Nordberg], 264
- Cervical osteotomy, See under Surgery**
- C-fibers, See under Nerve(s)**
- Chest**
- surgery of, See under Surgery, thoracic**
- Chest tube, See under Equipment**
- Chloroprocaine, See under Anesthetics, local**
- Clonidine, See under Sympathetic nervous system; Sympathetic nervous system, alpha-2 adrenergic agonists; Sympathetic nervous system, alpha<sub>2</sub>-adrenergic agonists**
- CO<sub>2</sub> laser, See under Equipment**
- Coagulation, See under Blood**
- Cocaine, See under Anesthetics, local**
- Colorectum, See under Anatomy**
- Complications**
- anaphylaxis**
    - intraoperative, in spina bifida, and testing for latex allergy (CO) [Moneret-Vautrin & Laxenaire], 391
  - intraoperative, in spina bifida, and testing for latex allergy (CO) [Slater & Mostello], 391
- anemia**
- in former preterm infants (CI) [Welborn, Hannallah, Luban, Fink & Ruttimann], 1003
- anoxia**
- midazolam improves electrophysiologic recovery after (LI) [Abramowicz, Kass, Chambers & Cottrell], 1121
- anxiety**
- terminology in preoperative anesthesia visit and (CO) [Jassy], 392
- apnea**
- in former preterm infants (CI) [Welborn, Hannallah, Luban, Fink & Ruttimann], 1003
  - rectal methohexital causing, in patients with myelomeningocele (CR) [Yemen, Pullerits, Stillman & Hershey], 1139
- arrhythmia(s)**
- drug-resistant, transesophageal indirect atrial pacing for (CR) [Pattison, Atlee, Krebs, Madireddi & Kettler], 1141
  - transesophageal atrial pacing to diagnose (CI) [Pattison, Atlee, Mathews, Buljubasic & Entress], 854
- arytenoid dislocation**
- after tracheal intubation (CR) [Castella, Gilabert & Perez], 613
- basilar skull fracture**
- complication from nasopharyngeal airway in (CR) [Muzzi, Lo-sasso & Cucchiara], 366
- bradycardia**
- in former preterm infants (CI) [Welborn, Hannallah, Luban, Fink & Ruttimann], 1003
- broken spinal catheter**
- should we seek their removal if sheared? (CO) [DeVera & Ries], 794
- broncospasm**
- following revascularization of cadaver kidney graft (CO) [Bar-doczky, Rausin, Hennart & dePauw], 200
- cardiac**
- in anterior mediastinal mass in dogs anesthetized with halothane (LI) [Johnson, Hurst, Cujec & Mayers], 725
- cardiac depression**
- following brachial plexus block (CO) [Gould], 634
  - following brachial plexus block (CO) [Lucas & Tsueda], 634
- central anticholinergic syndrome**
- following glycopyrrolate (CR) [Grum & Osborne], 191
- cyanosis**
- unrecognized, during laser treatment of cutaneous vascular lesions (CO) [Palmieri, Garden, Seleny & Stevenson], 1164
- desaturation**
- study of combined pulse oximetry and capnography in reduction of (CI) [Coté, Rolf, Liu, Goudsouzian, Ryan, Zaslavsky, Gore, Todres, Vassallo, Polander & Alifimoff], 980
- diabetes mellitus**
- perioperative management of surgical patients with (MI) [Hirsch, McGill, Cryer & White], 346
  - and surgery (EV) [Alberti], 209
- dwarfism**
- Cornelia de Lange syndrome, anesthetic management in (CO) [Sargent], 1162
- dwarfs**
- cervical spines of (CO) [Audenaert], 1172
  - cervical spines of (CO) [Berkowitz, Raja & Bender], 1173
- fires**
- in CO<sub>2</sub> laser resistance of various ointments and tapes (CO) [Green, Sonbolian, Gonzalez, Larson & Rehkopf], 964
- hemoptysis**
- heralds pseudoaneurysm induced by pulmonary artery catheter (CR) [Yellin, Filler & Barnette], 370

- herpes labialis**  
and intraspinal opioids (CO) [Beriault], 199  
and intraspinal opioids (CO) [Crone, Conly & Zbitnew], 200
- herpes zoster**  
epidural abscess in, associated with epidural catheterization (CR) [Strong], 943
- hiccups**  
occurring under anesthesia, termination of (CO) [Bannon], 385
- hypercarbia**  
study of combined pulse oximetry and capnography in reduction of (CI) [Coté, Rolf, Liu, Goudsouzian, Ryan, Zaslavsky, Gore, Todres, Vassallo, Polander & Alifimoff], 980
- hyperosmolar hyperglycemic nonketotic coma**  
perioperative management of surgical patients with (MI) [Hirsch, McGill, Cryer & White], 346
- hypokalemic familial periodic paralysis**  
cardiac surgery in, anesthetic management in (CR) [Lema, Urzua, Moran & Canessa], 373
- hypotension**  
after cardiopulmonary bypass, desmopressin and (CI) [Frankville, Harper, Lake & Johns], 988  
in response to oral clonidine and intravenous ephedrine (CI) [Nishikawa, Kimura, Taguchi & Dohi], 705  
during transesophageal pacing for drug-resistant sinus bradycardia (CR) [Pattison, Atlee, Krebs, Madireddi & Kettler], 1141  
during transfusion of autologous blood (CR) [Miller, Scherba-Krugliak, Toy & Drasner], 624
- hypoxemia**  
intraoperative, complicating sequential resection of bilateral pulmonary metastases (CR) [Antognini & Hanowell], 1137
- infections**  
epidural abscess in, associated with epidural catheterization (CR) [Strong], 943  
as hazard of reusing disposable syringes (CO) [Mangar], 791  
as hazard of reusing disposable syringes (CO) [Sherry & Davy], 790  
as hazard of reusing disposable syringes (CO) [Swygert, Donica & Ramsay], 790
- invasive monitoring**  
artifactual hypertension due to transducer cable malfunction (CR) [Raines, Hogue, Wickens, Welch & Risk], 1149
- ketoacidosis**  
perioperative management of surgical patients with (MI) [Hirsch, McGill, Cryer & White], 346
- methemoglobinemia**  
caused by benzocaine: recommended actions (CO) [Beutlich], 387  
caused by benzocaine: recommended actions (CO) [Severinghaus, Xu & Spellman], 385  
caused by benzocaine: recommended actions (CO) [Wachman], 387
- mitral valve regurgitation**  
hemodynamically significant, ventricular pacing can induce (CR) [Mark & Chetham], 375
- nausea**  
postoperative  
and vomiting, transdermal scopolamine and (CO) [Bailey], 199  
and vomiting, transdermal scopolamine and (CO) [Hendley], 198
- nystagmus**  
following epidural morphine (CO) [Stevens & Sharrock], 390
- obesity**  
sleep apnea after patient-controlled analgesia in (CR) [VanDercar, Martinez & DeLisser], 623
- oxidant-mediated injury**  
halothane and isoflurane increase pulmonary artery endothelial cell sensitivity to (LI) [Shayevitz, Varani, Ward & Knight], 1067
- palsy**  
from malpositioned chest tube after thoracotomy (CR) [Mangar, Kelly, Holder & Camporesi], 780
- paralysis**  
prolonged  
after long-term administration of vecuronium (CO) [Agoston], 792  
after long-term administration of vecuronium (CO) [Segredo, Sharma, Gruenke & Miller], 793
- paresthesia**  
from malpositioned chest tube after thoracotomy (CR) [Mangar, Kelly, Holder & Camporesi], 780
- periodic breathing**  
in former preterm infants (CI) [Welborn, Hannallah, Luban, Fink & Ruttimann], 1003
- pneumothrax**  
delayed onset of, following internal jugular vein cannulation (CO) [Dauber], 201
- pseudoaneurysm**  
induced by pulmonary artery catheter (CR) [Yellin, Filler & Barnette], 370
- pulmonary**  
viral respiratory  
effect of, on gas exchange and FRC response to anesthesia in sheep (LI) [Dueck, Prutow & Richman], 1044
- pulmonary edema**  
and lung density redistribution with positioning in ARF (CI) [Gattinoni, Pelosi, Vitale, Pesenti, D'Andrea & Mascheroni], 15
- pulmonary embolism**  
in perioperative period, protein C deficiency as cause of (CR) [Sternberg, Bailey, Lazarchick & Brahen], 364  
following tourniquet deflation (CR) [McGrath, Hsia & Epstein], 618
- reflex sympathetic dystrophy**  
epidural abscess in, associated with epidural catheterization (CR) [Strong], 943
- respiratory depression**  
early, following intrathecal fentanyl-morphine combination (CR) [Palmer], 1153
- sinus bradycardia**  
drug-resistant, transesophageal indirect atrial pacing for (CR) [Pattison, Atlee, Krebs, Radimeddi & Kettler], 1141
- sleep apnea syndrome**  
as contraindication for patient-controlled analgesia (CR) [VanDercar, Martinez & DeLisser], 623
- spontaneous movements**  
propofol and: an EEG study (CI) [Borgeat, Dessibourg, Popovic, Meier, Blanchard & Schwander], 24
- stroke**  
barbiturate protection against, and cardiac surgery (CI) [Zaidan, Klochany, Martin, Ziegler, Harless & Andrews], 406  
barbiturate protection against, and cardiac surgery (EV) [Todd, Hindman & Warner], 402
- substance abuse**  
nitrous oxide, presenting as premature exhaustion of Sodasorb (CO) [Lang], 382  
nitrous oxide, presenting as premature exhaustion of Sodasorb (CO) [Yudenfreund-Sujka], 383

- total spinal anesthesia**  
 following prophylactic blood patch (CO) [Leighton], 1166  
 following prophylactic blood patch (CO) [Leivers], 1166
- truncus arteriosus**  
 recognition and therapy of intraoperative cardiac ischemia (CR) [Wong, Baum & Sangwan], 378
- uremia**  
 standard dose of conduction anesthetic is excessive for patient with (CO) [Gould], 634  
 standard dose of conduction anesthetic is excessive for patient with (CO) [Lucas & Tsueda], 634
- ventilatory depression**  
 by desflurane in humans (CI) [Lockhart, Rampil, Yasuda, Eger & Weiskopf], 484  
 difficult pulmonary artery catheterization (CO) [Bergman & Jimenez], 962  
 fatal massive air embolism during transurethral resection of prostate (CR) [Vacanti & Lodh], 186  
 hazard with warming lights (CO) [Levine & Wald], 959  
 inadvertent intraarterial placement of sheath introducer while using Raulerson syringe (CO) [Stein & Shatz], 633  
 from nasopharyngeal airway in basilar skull fracture (CR) [Muzzi, Losasso & Cucchiara], 366  
 in obstetric anesthesia malpractice claims (CI) [Chadwick, Posner, Caplan, Ward & Cheney], 242  
 pulmonary artery catheter tip migration (CI) [Robertie, Johnston, Williamson, Dudas, Wallenhaupt & Ganz], 440  
 during tracheal extubation in children (CI) [Pounder, Blackstock & Steward], 653
- Computer simulation in pharmacokinetics, See under Pharmacokinetics**
- Computer-assisted tomography, See under Measurement techniques**
- Computers, See under Equipment**
- Contrast, See under Measurement techniques**
- Cornea, See under Eye(s)**
- Cornelia de Lange syndrome, See under Complications, dwarfism**
- Coronary arteries, See under Arteries**
- Coronary artery bypass graft, See under Surgery**
- Coronary artery bypass grafting, See under Surgery, cardiac**
- Coronary artery disease, See under Heart**
- Coronary hemodynamics, See under Heart**
- Coronary occlusion, See under Heart**
- Coronary perfusion, See under Heart**
- Coronary sinus blood flow, See under Heart**
- Cortisol, See under Hormones**
- Cyanide, See under Toxicity**
- Cyanosis, See under Complications**
- Cystic adenomatoid malformation, congenital, See under Lung(s)**
- Cytotoxicity, See under Toxicity**
- D**
- DADL, See under Analgesics, opiate**
- DAGO, See under Analgesics, opiate**
- Defibrillation, See under Heart**
- Delayed afterdepolarizations, See under Heart**
- Delta receptors, See under Receptors, opiate**
- 3-Desacetylvecuronium, See under Neuromuscular relaxants; Pharmacokinetics**
- Desaturation, See under Complications**
- Desflurane, See under Anesthetics, volatile**
- Desmopressin, See under Blood**
- Dexmedetomidine, See under Pharmacodynamics; Pharmacology; Premedication; Sympathetic nervous system,  $\alpha$ -adrenergic agonist; Sympathetic nervous system, alpha-2 adrenergic agonists**
- Diabetes mellitus, See under Complications**
- Differential block, See under Nerve(s)**
- Differential nerve block, See under Nerve(s)**
- Differential spinal block, See under Anesthetic techniques, spinal**
- Digit-Symbol Substitution Test (DSST), See under Recovery**
- Diltiazem, See under Pharmacology**
- Dogs, See under Animals**
- Do-not-resuscitate orders, See under Heart, cardiac arrest**
- Dopamine, See under Sympathetic nervous system**
- Doppler, See under Measurement techniques**
- Dose-response curve, See under Pharmacology**
- Double-lumen tracheostomy tube, See under Equipment**
- DPDPE, See under Analgesics, opiate**
- Drug elimination, See under Kidney; Liver**
- Drug interactions, See under Interactions (drug)**
- d-Tubocurarine, See under Muscle relaxants; Neuromuscular relaxants**
- Dural puncture headache, See under Headache**
- Dwarfs, See under Complications**
- E**
- Ear**  
 tympanic membrane  
 temperature measurement  
 isoflurane-induced vasodilation and (CI) [Sessler, McGuire, Moayeri & Hynson], 226
- Echocardiography, See under Measurement techniques; Monitoring**
- ED<sub>50</sub>, See under Potency, MAC**
- Education**  
 Rovenstine Lecture  
 28th: lessons from on high (SA) [Hornbein], 772  
 aid for simultaneous instructor and trainee viewing of orotracheal intubation (CO) [Morales & Gilbert], 1173
- Eicosanoids, See under Blood**
- Ejection fraction, See under Heart**
- Elderly, See under Age factors**
- Electrical field stimulation, See under Parasympathetic nervous system**
- Electrocardiography, See under Monitoring**
- Electroencephalogram, See under Brain; Monitoring, brain**
- Electroencephalography, See under Brain; Measurement techniques; Monitoring**
- Electromyography, See under Measurement techniques**
- Elimination of drugs, See under Pharmacokinetics**
- Ellis, J. E.**  
*Anesthesiology and Vascular Surgery* (BR), 636
- Embolism**  
 air  
 venous  
 causing sudden cardiac arrest during epidural anesthesia (CO) [Williams, Tempelhoff, Modica & Jellish], 1171  
 fatal massive during transurethral resection of prostate (CR) [Vacanti & Lodh], 186  
 carbon dioxide  
 successful resuscitation with cardiopulmonary bypass (CR) [Diakun], 1151  
 paradoxical  
 and detection of patent foramen ovale (CI) [Konstadt, Lovie, Black, Rao & Scanlon], 212

**pulmonary**

**thrombotic**

following tourniquet deflation (CR) [McGrath, Hsia & Epstein], 618

**venous air**

suspected, during epidural anesthesia (CR) [Jackson & Rauck], 190

**Emergence from anesthesia, See under Recovery**

**Endoplasmic reticulum, See under Gastrointestinal tract**

**Endotracheal intubation, See under Intubation**

**End-systolic pressure-length relationship, See under Heart**

**Enflurane, See under Anesthetics, volatile; Potency, MAC**

**Ephedrine, See under Pharmacology**

**Epidural anesthesia, See under Anesthetic techniques**

**Epidural blood patch, See under Anesthetic techniques**

**Epinephrine, See under Sympathetic nervous system**

**Equipment**

**alarm**

proposed new standards for, may make bad situation worse (CO) [Weinger], 791

**bronchoscope**

**fiberoptic**

in protection of recurrent laryngeal nerve during neck surgery (CO) [Tanigawa, Inove & Iwata], 966

**calculator**

pharmacokinetics with (CO) [Shafer], 631

**catheters**

narrow, high-efficiency delivery of salbutamol with metered-dose inhaler in (LR) [Taylor & Lerman], 360

placement of, prevention of blood spillage during (CO) [Fisher], 202

**pulmonary artery**

nominal hemoptysis heralds pseudoaneurysm induced by (CR) [Yellin, Filler & Barnette], 370

**chest tube**

malpositioned, brachial plexus compression from, after thoracotomy (CR) [Mangar, Kelly, Holder & Camporesi], 780

**computers**

for closed-loop infusion of atracurium (CI) [O'Hara, Derbyshire, Overdyk, Bogen & Marshall], 258

**gloves**

triple, to avoid contamination (CO) [Bragg], 631

**heating lamp**

hazard with (CO) [Levine & Wald], 959

**infusion pump**

method to prevent tampering with (CO) [Gudman], 1159

**jet stylet**

connecting of, to jet injector (CO) [Benumof, Gaughan, Ozaki & Rusk], 963

**laryngeal mask airway**

modification of (CO) [Wilson & Eastley], 1157

in protection of recurrent laryngeal nerve during neck surgery (CO) [Tanigawa, Inove & Iwata], 966

**lasers**

**CO<sub>2</sub>**

resistance of various ointments and tapes (CO) [Green, Sonbolian, Gonzalez, Larson & Rehkopf], 964

in treatment of cutaneous vascular lesions, unrecognized cyanosis during (CO) [Palmieri, Garden, Seleny & Stevenson], 1164

**microcatheter**

continuous spinal, complication of (CO) [DeVera & Ries], 794

**monitors**

noninvasive blood pressure, erroneous blood pressure measurements with (CO) [Eames], 967

noninvasive blood pressure, erroneous blood pressure measurements with (CO) [Ehlers & Grabenbauer], 967

Puritan-Bennett, and Nellcor® pulse oximeter probe, compatibility between (CO) [Dugan], 197

**nasopharyngeal airway**

complication from, in basilar skull fracture (CR) [Muzzi, Losasso & Cucchiara], 366

**nerve stimulators**

in vascular insufficiency after repair of radial club hands in infants (CR) [Audenaert, Vickers & Burgess], 368

**neutracer**

in protection of recurrent laryngeal nerve during neck surgery (CO) [Tanigawa, Inove & Iwata], 966

**noninvasive**

**accuracy**

for mean arterial pressure measurements in anesthetized patients (CI) [Gibbs, Larach & Derr], 647

**bias**

for mean arterial pressure measurements in anesthetized patients (CI) [Gibbs, Larach & Derr], 647

**Finapres<sup>®</sup>**

for mean arterial pressure measurements in anesthetized patients (CI) [Gibbs, Larach & Derr], 647

**oximeter pulmonary artery catheter**

to monitor hepatic venous oxygen saturation during liver surgery (CI) [Kainuma, Fujiwara, Kimura, Shitaokoshi, Nakashima & Shimada], 49

**pacemakers**

and transesophageal indirect atrial pacing for drug-resistant sinus bradycardia (CR) [Pattison, Atlee, Krebs, Radimeddi Kettler], 1141

**pulmonary artery catheter**

difficult catheterization with, in tricuspid regurgitation (CO) [Baraka, Nawfal & Dahdah], 393

**pulse oximeter**

**probe**

another site for (CO) [Robertson & Kaplan], 198

Nellcor®, probe, and Puritan-Bennett surgical monitor compatibility between (CO) [Dugan], 197

**syringes**

disposable, hazards of reusing (CO) [Mangar], 791

disposable, hazards of reusing (CO) [Sherry & Davy], 790

disposable, hazards of reusing (CO) [Swygert, Donica & Ramsay], 790

**Raulerson**

inadvertent intraarterial placement of sheath introducer while using (CO) [Stein & Shatz], 633

**Thompson chin support**

during radiotherapy (CO) [Brock-Utne & Haddow], 381

**tourniquet**

deflation, massive pulmonary embolism following (CR) [McGrath, Hsia & Epstein], 618

**tracheal tubes**

narrow, high-efficiency delivery of salbutamol with metered-dose inhaler in (LR) [Taylor & Lerman], 360

**transfusion device**

modified Y-type set for efficient blood transfusion (CO) [Ho & Contardi], 203

**tube(s)**

**double-lumen endotracheal**

bilateral upper lobe obstruction from (CO) [Brodsky & Mark], 1163

for postoperative independent lung ventilation in single-lung

- transplant recipient (CR) [Smiley, Navedo, Kirby & Schulman], 1144
- double-lumen tracheostomy  
for tracheostomies (CO) [Brodsky, Tobler & Mark], 387
- endotracheal  
caution on use of routine depth of insertion of (CO) [Cheney], 962  
caution on use of routine depth of insertion of (CO) [Sosis & Harbut], 961  
difficult extubation, unusual cause of (CO) [Sprung, Conley & Brown], 796  
difficult extubation, unusual cause of (CO) [Virag], 796  
for percutaneous transtracheal jet ventilation (CO) [Delaney & Kaiser], 952
- Esmolol, *See under Sympathetic nervous system*
- Esophageal ileocoloplasty, *See under Gastrointestinal tract*
- Ethics  
in publishing (EV) [Smith, Miller, Saidman & Morgan], 637  
and "do-not-resuscitate" orders during anesthesia and surgery (SA) [Truog], 606
- Etomidate, *See under Anesthetics, intravenous*
- Evoked potentials, *See under Spinal cord*
- Extracorporeal shock wave lithotripsy, *See under Kidney*
- Eye(s)  
cornea  
in study of lidocaine suppression of tonic neural injury discharge (LR) [Tanelian & MacIver], 934

## F

- Fentanyl, *See under Analgesics; Analgesics, intrathecal; Analgesics, opioid; Analgesics, opioids; Anesthetics, intravenous; Anesthetic techniques, spinal; Anesthetics, intravenous; Opioids; Potency, MAC*
- Fetus, *See under Pregnancy*
- Fiberoptic bronchoscope, *See under Equipment*
- Fiberoptic bronchoscopy, *See under Monitoring*
- Fiberoptic intubation, *See under Intubation*
- Finapres<sup>®</sup>, *See under Equipment*
- Fires, *See under Complications*
- Flumazenil, *See under Antagonists; Antagonists, miscellaneous; Hypnotics, benzodiazepines; Ro-15-1788*
- Flunitrazepam, *See under Anesthetics, intravenous*
- Free fatty acid, *See under Metabolism*
- Fulminant hepatitis, *See under Liver*
- Functional refractory period, *See under Heart*
- Functional residual capacity, *See under Lung(s)*
- Fura-2, *See under Ions, calcium; Measurement techniques*

## G

- Gamma-interferon, *See under Pharmacology, biologic response modifier*
- Ganglionic blockers, *See under Autonomic nervous system*
- Gas exchange, *See under Lung(s)*
- Gastrointestinal tract  
blood flow  
supplying esophageal ileocoloplasty, isoflurane, not halothane, increases (CI) [Jacob, Boudaoud, Payen, Rabarg, Sarfati, Gossot, Villiers & Evrin], 699
- endoplasmic reticulum  
<sup>45</sup>Ca<sup>2+</sup> uptake and release, in swine susceptible to malignant hyperthermia (LI) [Iaizzo, Seewald, Olsen, Wedel, Chapman, Berggren, Eichinger & Powis], 531
- esophageal ileocoloplasty  
mesenteric blood flow supplying, isoflurane, not halothane, in-

creases (CI) [Jacob, Boudaoud, Payen, Rabarg, Sarfati, Gossot, Villiers & Evrin], 699

## small intestine

- blood flow  
effects of perioperative hemodilution on (LI) [Nöldge, Priebe, Bohle, Buttler & Geiger], 908
- oxygen uptake  
effects of perioperative hemodilution on (LI) [Nöldge, Priebe, Bohle, Buttler & Geiger], 908
- surface PO<sub>2</sub>  
effects of perioperative hemodilution on (LI) [Nöldge, Priebe, Bohle, Buttler & Geiger], 908
- General anesthesia, *See under Anesthesia*
- Genetics factors  
and Ca<sup>2+</sup> mobilization in hepatocytes from swine with malignant hyperthermia (LI) [Iaizzo, Seewald, Olsen, Wedel, Chapman, Berggren, Eichinger & Powis], 531
- Glomerular filtration, *See under Kidney*
- Gloves, *See under Equipment*
- Glucagon, *See under Hormones*
- Glucose, *See under Metabolism*
- Glycopyrrrolate, *See under Parasympathetic nervous system; Pre-medication*
- Growth hormone, *See under Hormones*
- Guinea pig, *See under Animals*

## H

- Halothane, *See under Anesthetics, volatile*
- Head and neck surgery, *See under Surgery*
- Headache  
air  
subdural intracranial air after epidural steroid injection (CR) [Katz, Lukin, Bridenbaugh & L. Gunzenhauser], 615
- dural puncture  
subdural intracranial air after epidural steroid injection (CR) [Katz, Lukin, Bridenbaugh & L. Gunzenhauser], 615
- spinal  
subdural intracranial air after epidural steroid injection (CR) [Katz, Lukin, Bridenbaugh & L. Gunzenhauser], 615
- subdural  
subdural intracranial air after epidural steroid injection (CR) [Katz, Lukin, Bridenbaugh & L. Gunzenhauser], 615  
post-dural puncture, in HIV-positive patient (CO) [Gibbons], 953
- Heart  
arrhythmia(s)  
automatic implantable cardioverter defibrillator in, lithotripsy in patient with (CR) [Long & Venditti], 937  
and bupivacaine, hyponatremia and hyperkalemia enhancing (CO) [Moore], 383  
and bupivacaine, hyponatremia and hyperkalemia enhancing (CO) [Timour, Freysz, Mazze, Couzon, Bertrix & Faucon], 384  
drug-resistant, transesophageal indirect atrial pacing for (CR) [Pattison, Atlee, Krebs, Radimedi & Kettler], 1141  
and effects of halothane and delayed afterdepolarizations in myocytes (LI) [Freeman & Li], 146  
and myocardial sensitization by halothane (LI) [Hayashi, Sumikawa, Yamatodani, Kamibayashi, Kuro & Yoshiya], 134  
transesophageal atrial pacing to diagnose (CI) [Pattison, Atlee, Mathews, Buljubasic & Entress], 854
- atrial rate  
with diltiazem and volatile anesthetics (LI) [Gallenberg, Stowe, Marijic, Kampine & Bosnjak], 519

- atrial septal defect**  
repair of, unilateral pulmonary edema after (CR) [Schiff & Simpson], 785  
study of patent foramen ovale in (CI) [Konstadt, Lovie, Black, Rao & Scanlon], 212
- atrioventricular block**  
with diltiazem and volatile anesthetics (LI) [Gallenberg, Stowe, Marijic, Kampine & Bosnjak], 519
- atrioventricular conduction interval**  
with diltiazem and volatile anesthetics (LI) [Gallenberg, Stowe, Marijic, Kampine & Bosnjak], 519
- atrioventricular junctional rhythm**  
transesophageal atrial pacing to diagnose (CI) [Pattison, Atlee, Mathews, Buljubasic & Entress], 854
- automatic implantable cardioverter defibrillator**  
lithotripsy in patient with (CR) [Long & Venditti], 937
- blood flow**  
assessed by scintigraphy during discontinuation of mechanical ventilation (CI) [Hurford, Lynch, Strauss, Lowenstein & Zapol], 1007  
desflurane, isoflurane, halothane, and enflurane influence on, in chronically instrumented dog (LI) [Pagel, Kampine, Schmeling & Warltier], 539
- calcium current**  
and anesthetics and calcium current (LI) [Bosnjak, Supan & Rusch], 340
- cardiac arrest**  
do-not-resuscitate orders  
during anesthesia and surgery (SA) [Truog], 606  
sudden, during epidural anesthesia: venous air embolism? (CO) [Williams, Tempelhoff, Modica & Jellish], 1171
- cardiac depression**  
following brachial plexus block (CO) [Gould], 634  
following brachial plexus block (CO) [Lucas & Tsueda], 634  
desflurane, isoflurane, halothane, and enflurane influence on, in chronically instrumented dog (LI) [Pagel, Kampine, Schmeling & Warltier], 539
- cardiac output**  
desflurane, isoflurane, halothane, and enflurane influence on, in chronically instrumented dog (LI) [Pagel, Kampine, Schmeling & Warltier], 539  
in desflurane-induced hypotension in dogs (LI) [Milde & Milde], 513  
simultaneous intraoperative measurement of, by thermodilution and transtracheal Doppler (CI) [Siegel, Fitzgerald & Engstrom], 664
- cardiac pacing**  
can induce hemodynamically significant mitral valve regurgitation (CR) [Mark & Chetham], 375
- cardiac depression**  
in response to protamine (CO) [Lee & Lin], 635
- cardiopulmonary resuscitation**  
epinephrine and acid-base status during (LI) [Lindner, Ahnefeld, Bowdler & Prengel], 333
- cardiovascular physiology**  
desflurane, isoflurane, halothane, and enflurane influence on, in chronically instrumented dog (LI) [Pagel, Kampine, Schmeling & Warltier], 539
- cardiovascular system**  
ejection fraction to measure ventricular performance of (MI) [Robotham, Takata, Berman & Harasawa], 172
- cellular electrophysiology**  
effects of bupivacaine on (LI) [Sun & Rosen], 893
- compression**  
in anterior mediastinal mass in dogs anesthetized with halothane (LI) [Johnson, Hurst, Cujec & Mayers], 725
- coronary artery disease**  
flumazenil in, coronary hemodynamics following reversal of (CI) [Marty, Nitenberg, Philip, Foult, Joyon & Desmonts], 71
- contractility**  
anesthetics and (LI) [Baele & Housmans], 281  
desflurane, isoflurane, halothane, and enflurane influence on, in chronically instrumented dog (LI) [Pagel, Kampine, Schmeling & Warltier], 539  
influence of isoflurane or desflurane on (LI) [Pagel, Kampine, Schmeling & Warltier], 900  
positive inotropic effect of ketamine on (LI) [Cook, Carton & Housmans], 880
- coronary artery disease**  
bypass graft surgery in, isoflurane *versus* sufentanil anesthesia for (CI) [Leung, Goehner, O'Kelly, Hollenberg, Pineda, Cason, Mangano & SPI Research Group], 838  
and enhanced coronary collateral blood flow and isoflurane (LI) [Hartman, Kampine, Schmeling & Warltier], 744  
and isoflurane (LI) [Hartman, Kampine, Schmeling & Warltier], 120  
postoperative, in patients undergoing coronary artery bypass graft surgery (CI) [Smith, Leung, Mangano & SPI Research Group], 464  
pressure rate quotient as predictor of myocardial ischemia in (CI) [Gordon, Urban, O'Connor & Barash], 848
- coronary blood flow**  
collateral, enhanced, and isoflurane (LI) [Hartman, Kampine, Schmeling & Warltier], 744  
comparison of effects of isoflurane and desflurane on, in chronically instrumented dog (LI) [Merin, Bernard, Doursout, Cohen & Chelly], 568  
in intracoronary isoflurane in dogs (LI) [Crystal, Kim, Czinn, Salem, Mason & Abdel-Latif], 757  
and isoflurane (LI) [Hartman, Kampine, Schmeling & Warltier], 120
- coronary flow**  
and amrinone during anesthesia with isoflurane (LI) [Rooney, Stowe, Marijic, Bosnjak & Kampine], 559
- coronary hemodynamics**  
desflurane, isoflurane, halothane, and enflurane influence on, in chronically instrumented dog (LI) [Pagel, Kampine, Schmeling & Warltier], 539  
and enhanced coronary collateral blood flow and isoflurane (LI) [Hartman, Kampine, Schmeling & Warltier], 744  
and isoflurane (LI) [Hartman, Kampine, Schmeling & Warltier], 120
- coronary occlusion**  
and enhanced coronary collateral blood flow and isoflurane (LI) [Hartman, Kampine, Schmeling & Warltier], 744  
and isoflurane (LI) [Hartman, Kampine, Schmeling & Warltier], 120
- coronary perfusion**  
intraoperative, in truncus arteriosus (CR) [Wong, Baum & Sangwan], 378
- coronary sinus blood flow**  
flumazenil and (CI) [Marty, Nitenberg, Philip, Foult, Joyon & Desmonts], 71
- coronary steal**  
and enhanced coronary collateral blood flow and isoflurane (LI) [Hartman, Kampine, Schmeling & Warltier], 744  
and isoflurane (LI) [Hartman, Kampine, Schmeling & Warltier], 120



- defibrillation**  
lithotropy in patient with (CR) [Long & Venditti], 937
- ejection fraction**  
to measure ventricular performance (MI) [Robotham, Takata, Berman & Harasawa], 172
- electrophysiology**  
and amrinone during anesthesia with isoflurane (LI) [Rooney, Stowe, Marijic, Bosnjak & Kampine], 559
- end-systolic pressure-length relationship**  
influence of isoflurane or desflurane on (LI) [Pagel, Kampine, Schmeling & Wartier], 900
- function**  
comparison of effects of isoflurane and desflurane on, in chronically instrumented dog (LI) [Merin, Bernard, Doursout, Cohen & Chelly], 568
- functional refractory period**  
with diltiazem and volatile anesthetics (LI) [Gallenberg, Stowe, Marijic, Kampine & Bosnjak], 519
- heart rate**  
fetal, response of, to maternal administration of esmolol (CR) [Losasso, Muzzi & Cucchiara], 782
- inotropic state**  
influence of isoflurane or desflurane on (LI) [Pagel, Kampine, Schmeling & Wartier], 900
- ischemia**  
prediction of by pressure rate quotient  
in patients undergoing coronary artery bypass surgery (CI) [Gordon, Urban, O'Connor & Barash], 848  
how best to monitor for detection of (CO) [Slogoff & Keats], 1172  
how best to monitor for detection of (CO) [Steinbrook, Goldman, Mark, Philip & Raemer], 1171
- isolated**  
and amrinone during anesthesia with isoflurane (LI) [Rooney, Stowe, Marijic, Bosnjak & Kampine], 559  
cardiac contraction in, with diltiazem and volatile anesthetics (LI) [Gallenberg, Stowe, Marijic, Kampine, & Bosnjak], 519  
effects of halothane, enflurane, and isoflurane on oxygen supply and demand in (LI) [Stowe, Marijic, Bosnjak & Kampine], 1087
- left ventricle**  
diastolic function  
alteration of, by desflurane, isoflurane, and halothane, in autonomic nervous system blockade (LI) [Pagel, Kampine, Schmeling & Wartier], 1103
- left ventricular function**  
flumazenil and (CI) [Marty, Nitenberg, Philip, Foul, Joyon & Desmots], 71
- left ventricular pressure**  
and amrinone during anesthesia with isoflurane (LI) [Rooney, Stowe, Marijic, Bosnjak & Kampine], 559  
with diltiazem and volatile anesthetics (LI) [Gallenberg, Stowe, Marijic, Kampine & Bosnjak], 519
- muscles of, See under Muscle, cardiac**
- myocardial function**  
desflurane, isoflurane, halothane, and enflurane influence on, in chronically instrumented dog (LI) [Pagel, Kampine, Schmeling & Wartier], 539
- myocardial infarction**  
postoperative, in patients undergoing coronary artery bypass graft surgery (CI) [Smith, Leung, Mangano & SPI Research Group], 464
- myocardial ischemia**  
and enhanced coronary collateral blood flow and isoflurane (LI) [Hartman, Kampine, Schmeling & Wartier], 744  
intraoperative, in truncus arteriosus (CR) [Wong, Baum & Sangwan], 378  
and isoflurane (LI) [Hartman, Kampine, Schmeling & Wartier], 120  
isoflurane anesthesia and (CI) [Leung, Goehner, O'Kelly, Hollenberg, Pineda, Cason, Mangano & SPI Research Group], 838  
postoperative, in patients undergoing coronary artery bypass graft surgery (CI) [Smith, Leung, Mangano & SPI Research Group], 464  
postoperative, possibly masked by epidural fentanyl analgesic (CR) [Oden & Karagianes], 941
- myocardial metabolism**  
flumazenil and (CI) [Marty, Nitenberg, Philip, Foul, Joyon & Desmots], 71
- myocardial oxygen consumption**  
and amrinone during anesthesia with isoflurane (LI) [Rooney, Stowe, Marijic, Bosnjak & Kampine], 559  
in intracoronary isoflurane in dogs (LI) [Crystal, Kim, Czinn, Salem, Mason & Abdel-Latif], 757
- myocytes**  
delayed afterdepolarizations  
halothane and (LI) [Freeman & Li], 146
- pacings**  
transesophageal indirect atrial  
in anesthetized patients (CI) [Pattison, Atlee, Mathews, Buljubasic & Entress], 854
- papillary muscles**  
electrophysiologic effects of bupivacaine on (LI) [Sun & Rosen], 893
- patent foramen ovale**  
intraoperative detection of, by transesophageal echocardiography (CI) [Konstadt, Lovie, Black, Rao & Scanlon], 212
- perfused**  
with diltiazem and volatile anesthetics (LI) [Gallenberg, Stowe, Marijic, Kampine & Bosnjak], 519
- perioperative myocardial infarction**  
pressure rate quotient as predictor of (CI) [Gordon, Urban, O'Connor & Barash], 848
- perioperative myocardial ischemia**  
pressure rate quotient as predictor of (CI) [Gordon, Urban, O'Connor & Barash], 848
- preload recruitable stroke work**  
influence of isoflurane or desflurane on (LI) [Pagel, Kampine, Schmeling & Wartier], 900
- silent myocardial ischemia**  
postoperative, in patients undergoing coronary artery bypass graft surgery (CI) [Smith, Leung, Mangano & SPI Research Group], 464
- single cell**  
and anesthetics and calcium current (LI) [Bosnjak, Supan & Rusch], 340
- sinus bradycardia**  
drug-resistant, transesophageal indirect atrial pacing for (CR) [Pattison, Atlee, Krebs, Radimeddi & Kettler], 1141  
transesophageal atrial pacing to diagnose (CI) [Pattison, Atlee, Mathews, Buljubasic & Entress], 854
- Starling's Law**  
anesthetics and (LI) [Baele & Housmans], 281
- ventricular function**  
desflurane, isoflurane, halothane, and enflurane influence on, in chronically instrumented dog (LI) [Pagel, Kampine, Schmeling & Wartier], 539  
ejection fraction for measurement of (MI) [Robotham, Takata, Berman & Harasawa], 172

- Wenckebach's periodicity  
with diltiazem and volatile anesthetics (LI) [Gallenberg, Stowe,  
Marijic, Kampine & Bosnjak], 519
- Heat**  
thermal flux transducers  
in determination of perioperative thermal insulation (CI)  
[Sessler, McGuire & Sessler], 875
- Heating lamp, *See under* Equipment
- Helfaer, M. A.  
*Anesthesia for Plastic and Reconstructive Surgery* (BR), 1176
- Hemodilution, *See under* Blood
- Hemodynamic response, *See under* Blood
- Hemodynamics, *See under* Blood; Monitoring
- Hemoptysis, *See under* Complications
- Hemorrhagic shock, *See under* Shock
- Heparin, *See under* Blood
- Hepatic blood flow, *See under* Liver
- Hepatic surgery, *See under* Surgery
- Hepatic venous oxygen saturation, *See under* Monitoring
- Hepatitis, *See under* Liver
- Hepatocytes, *See under* Liver
- Herpes labialis, *See under* Complications
- Herpes zoster, *See under* Complications; Pain
- Herpesvirus infections, *See under* Infection
- Hexamethonium, *See under* Autonomic nervous system, ganglionic  
blockers
- Hiccups, *See under* Complications
- High-frequency oscillation, *See under* Ventilation
- Hippocampal slice, *See under* Brain
- Histamine-containing cells  
basophils  
heterogeneity of, in response to muscle relaxants (LI) [Stellato,  
dePaulis, Cirillo, Mastronardi, Mazzarella & Marone], 1078  
mast cells  
heterogeneity of, in response to muscle relaxants (LI) [Stellato,  
dePaulis, Cirillo, Mastronardi, Mazzarella & Marone], 1078
- Holter electrocardiography, *See under* Monitoring
- Hormones**  
calcitonin  
intravenous, alleviates spinal anesthesia-induced phantom limb  
pain (CR) [Fiddler & Hindman], 187  
cortisol  
in perioperative management of surgical patients with diabetes  
mellitus (MI) [Hirsch, McGill, Cryer & White], 346  
glucagon  
in perioperative management of surgical patients with diabetes  
mellitus (MI) [Hirsch, McGill, Cryer & White], 346  
growth hormone  
in perioperative management of surgical patients with diabetes  
mellitus (MI) [Hirsch, McGill, Cryer & White], 346  
insulin  
effects of, on exogenous intravenous glucose, in anesthetized  
children (CI) [Mikawa, Maekawa, Goto, Tanaka, Yaku &  
Obara], 1017  
in perioperative management of surgical patients with diabetes  
mellitus (MI) [Hirsch, McGill, Cryer & White], 346
- Hydromorphone, *See under* Anesthetics, epidural
- Hydroxocobalamin, *See under* Antidotes cyanide; Pharmacology
- Hypercarbia, *See under* Complications
- Hyperglycemia, *See under* Metabolism
- Hyperkalemia, *See under* Ions, potassium
- Hyperosmolar hyperglycemic nonketotic coma, *See under* Compli-  
cations
- Hyperpolarization  
cerebral, *See under* Brain
- Hypertension, *See under* Complications
- Hyperthermia**  
malignant  
contracture test  
desflurane and (LI) [Wedel, Iaizzo & Milde], 508  
Ca<sup>+</sup> mobilization in hepatocytes from swine with (LI) [Iaizzo,  
Seewald, Olsen, Wedel, Chapman, Berggren, Eichinger &  
Powis], 531
- Hypnotics**  
benzodiazepines  
flumazenil  
and coronary hemodynamics (CI) [Marty, Nitenberg, Philip,  
Foult, Joyon & Desmonts], 71  
midazolam  
terminates bupivacaine toxicity (LI) [Bernards & Artru], 89  
intravenous  
midazolam  
and butorphanol, comparison of sedative effects of (CI) [Dersh-  
witz, Rosow, DiBiase & Zaslavsky], 717  
midazolam  
intranasal  
plasma concentrations of, in children (CI) [Walbergh, Willis &  
Eckhart], 233  
amnesia, EEG as monitor of (CI) [Veselis, Reinsel, Alagesan,  
Heino & Bedford], 866  
and fentanyl, interaction of, in enflurane-anesthetized dogs (LI)  
[Schweiger, Hall & Hug], 1060  
preanesthetic medication in elderly, dose-finding study of (CI)  
[Wong, Fragen & Dunn], 675
- Hypocapnia, *See under* Carbon dioxide
- Hypoglycemia, *See under* Metabolism
- Hypokalemic familial periodic paralysis, *See under* Complications
- Hyponatremia, *See under* Ions, sodium
- Hypotension, *See under* Complications
- Hypothalamus, *See under* Brain
- Hypothermia, *See under* Temperature
- Hypovolemia, *See under* Blood
- Hypoxemia, *See under* Complications
- Hypoxia**  
postoperative  
and oxygen administration (CO) [Canet, Ricos & Vidal], 1161  
and oxygen administration (CO) [Moller], 1161
- Hysteroscopy, *See under* Surgery
- I
- I-653, *See under* Anesthetics, volatile; Anesthetics, volatile, des-  
flurane
- Independent lung ventilation, *See under* Postoperative care
- Induction**  
anesthesia  
in children with rectally administered midazolam (CI) [Spear,  
Yaster, Berkowitz, Maxwell, Bender, Naclerio, Manolio &  
Nichols], 670  
of propofol in unpremedicated children (CI) [Hannallah, Baker,  
Casey, McGill, Broadman & Norden], 217
- Infection**  
AIDS  
epidural blood patch in patient with (CO) [Bevacqua & Slucky],  
953  
epidural blood patch in patient with (CO) [Gibbons], 953  
herpesvirus  
and intraspinal opioids (CO) [Beriault], 199  
and intraspinal opioids (CO) [Crone, Conly & Zbitnew], 200

- pulmonary**  
effect of, on gas exchange and FRC response to anesthesia in sheep (LI) [Dueck, Prutow & Richman], 1044
- viral respiratory**  
general anesthesia in patients with (EV) [Jacoby & Hirshman], 969
- See also under Complications*
- Infusion pump, See under Equipment**
- Inhalational anesthesia, See under Anesthetic techniques, inhalational**
- Inotropic state, See under Heart**
- Instrumental delivery, See under Anesthesia, obstetric**
- Insufflation, See under Anesthetic techniques**
- Insulin, See under Hormones**
- Interactions (drug)**  
and comparison of sedative effects of butorphanol and midazolam (CI) [Dershwitz, Rosow, DiBiase & Zaslavsky], 717  
respiratory effects of clonidine alone and combined with morphine, in humans (CI) [Bailey, Sperry, Johnson, Eldredge, East, East, Pace & Stanley], 43
- Intermittent positive pressure ventilation, See under Ventilation**
- Internal jugular vein, See under Veins**
- Internal jugular vein cannulation, See under Anesthetic techniques**
- Intracranial pressure, See under Brain**
- Intrathecal analgesics, See under Analgesics intrathecal**
- Intravenous sedation, See under Sedation**
- Intubation**  
**endotracheal**  
arytenoid dislocation after (CR) [Castella, Gilabert & Perez], 613  
**fiberoptic**  
orotracheal  
aid for simultaneous instructor and trainee viewing of (CO) [Morales & Gilbert], 1173  
**tracheal**  
aid in cases of difficult (CO) [Cahen], 197
- Ions**  
**calcium**  
calcium channel  
signaling, and transmitter release in neural cell line, effects of volatile anesthetics on (LI) [Kress, Müller, Eisert, Gilge, Tas & Koschel], 309  
calcium channel blockers  
binding to bovine cardiac sarcolemma, volatile anesthetics depress (LI) [Drenger, Quigg & Blanck], 155  
cardiac conduction with, and volatile anesthetics (LI) [Gallenberg, Stowe, Marijic, Kampine & Bosnjak], 519  
calcium influx  
changes in, during anoxia, midazolam reduces (LI) [Abramowicz, Kass, Chambers & Cottrell], 1121  
calcium transients  
fura-2 in myocytes exposed to isoproterenol and halothane (LI) [Freeman & Li], 146  
current sensitivity  
effects of volatile anesthetics on (LI) [Eskinder, Rusch, Supan, Kampine & Bosnjak], 919  
L-type calcium channel currents  
effects of volatile anesthetics on (LI) [Eskinder, Rusch, Supan, Kampine & Bosnjak], 919  
T-type calcium channel currents  
effects of volatile anesthetics on (LI) [Eskinder, Rusch, Supan, Kampine & Bosnjak], 919  
current in isolated canine ventricular cells, effects of volatile anesthetics on (LI) [Bosnjak, Supan & Rusch], 340  
in hepatocytes from swine with malignant hyperthermia (LI) [Iaizzo, Seewald, Olsen, Wedel, Chapman, Berggren, Eichinger & Powis], 531
- magnesium**  
anesthesia, and hemodynamic control (EV) [Zaloga & Eisenach], 1  
inhibits hypertensive but not cardiotoxic actions of low-dose epinephrine (CI) [Prielipp, Zaloga, Butterworth, Robertie, Dudas, Black & Royster], 973  
and maternal blood pressure during epidural anesthesia (LI) [Vincent, Chestnut, Sipes, Weiner, DeBruyn & Bleuer], 77
- potassium**  
**hyperkalemia**  
influence of, on ventricular conduction and rhythm disorders caused by bupivacaine (CO) [Moore], 383  
influence of, on ventricular conduction and rhythm disorders caused by bupivacaine (CO) [Timour, Freysz, Mazze, Couzon, Bertrix & Faucon], 384  
transfusion-induced (CO) [Bucol & Short], 1168  
transfusion-induced (CO) [Jameson, Popic & Harms], 1169
- sodium**  
**hyponatremia**  
influence of, on ventricular conduction and rhythm disorders caused by bupivacaine (CO) [Moore], 383  
influence of, on ventricular conduction and rhythm disorders caused by bupivacaine (CO) [Timour, Freysz, Mazze, Couzon, Bertrix & Faucon], 384  
sodium channel blockers  
use-dependent, neuropathic pain can be relieved by (CR) [Tanelian & Brose], 949
- Ischemia**  
**myocardial, See under Heart**
- Isolfurane, See under Anesthetics, volatile**
- Isoproterenol, See under Sympathetic nervous system**
- J**
- Jet Stylet, See under Equipment**
- Jet ventilation, See under Anesthetic techniques**
- K**
- Ketamine, See under Anesthetics, intravenous**
- Ketoacidosis, See under Complications**
- Ketone bodies, See under Metabolism**
- Kidney**  
**blood flow**  
comparison of effects of isoflurane and desflurane on, in chronically instrumented dog (LI) [Merin, Bernard, Doursout, Cohen & Chelly], 568  
effects of enflurane and isoflurane on, in chronically instrumented dogs (LI) [Bernard, Doursout, Wouters, Hartley, Cohen, Merin & Chelly], 298  
during prolonged isoflurane-induced hypotension in humans (CI) [Lessard & Trépanier], 860  
**diuresis**  
during prolonged isoflurane-induced hypotension in humans (CI) [Lessard & Trépanier], 860  
**drug elimination**  
of 3-desacetylvecuronium in cats (LI) [Segredo, Shin, Sharma, Gruenke, Caldwell, Khuenl-Brady, Agoston & Miller], 1052  
**extracorporeal shock wave lithotripsy**  
in patient with automatic implantable cardioverter defibrillator (CR) [Long & Venditti], 937

- filtration**
    - glomerular
      - during prolonged isoflurane-induced hypotension in humans (CI) [Lessard & Trépanier], 860
  - function**
    - during prolonged isoflurane-induced hypotension in humans (CI) [Lessard & Trépanier], 860
  - lithotripsy**
    - outpatient, alfentanil and ketamine combined with midazolam for, compared (CI) [Monk, Rater & White], 1023
- Kirsch, J. R.**  
*Clinical Anesthesia in Neurosurgery* (BR), 1175

**L**

- Labetalol**, *See under Sympathetic nervous system*
- Lactate**, *See under Metabolism*
- Laparoscopy**, *See under Surgery*
- Laryngeal mask airway**, *See under Equipment*
- Larynx**
  - muscles, *See under Muscle, skeletal larynx*
  - vocal cords
    - pressure measurements
      - during anesthesia (CI) [Donati, Plaud & Meistelman], 827
      - neuromuscular blockade of adductor muscles of, and of adductor pollicis, compared (CI) [Donati, Meistelman & Plaud], 833
- Lasers**, *See under Equipment*
- Laudanosine**, *See under Neuromuscular relaxants, atracurium*
- Leahy, J. J.**  
*The History of Anaesthesia* (BR), 798
- Left ventricular diastolic function**, *See under Heart*
- Left ventricular function**, *See under Heart*
- Left ventricular pressure**, *See under Heart*
- Lidocaine**, *See under Anesthetics, local*
- Lithotripsy**, *See under Kidney*
- Liver**
  - blood flow**
    - comparison of effects of isoflurane and desflurane on, in chronically instrumented dog (LI) [Merin, Bernard, Doursout, Cohen & Chelly], 568
    - effects of acute normovolemic hemodilution on (LI) [Nöldge, Priebe, Bohle, Buttler & Geiger], 908
    - effects of enflurane and isoflurane on, in chronically instrumented dogs (LI) [Bernard, Doursout, Wouters, Hartley, Cohen, Merin & Chelly], 298
  - drug elimination**
    - of 3-desacetylvecuronium in cats (LI) [Segredo, Shin, Sharma, Gruenke, Caldwell, Khuenl-Brady, Agoston & Miller], 1052
  - fulminant hepatitis**
    - study of neuromuscular blocking properties of 3-desacetylvecuronium in cats with (LI) [Segredo, Shin, Sharma, Gruenke, Caldwell, Khuenl-Brady, Agoston & Miller], 1052
  - hepatitis**
    - the 29th Rovenstine Lecture: Clinical Challenges for the Anesthesiologist (SA) [Stoelting], 1129
  - hepatocytes**
    - isolated
      - Ca<sup>2+</sup> mobilization in, from swine with malignant hyperthermia (LI) [Iaizzo, Seewald, Olsen, Wedel, Chapman, Berggren, Eichinger & Powis], 531
  - histology**
    - effects of acute normovolemic hemodilution on (LI) [Nöldge, Priebe, Bohle, Buttler & Geiger], 908

- metabolism**
  - effects of acute normovolemic hemodilution on (LI) [Nöldge, Priebe, Bohle, Buttler & Geiger], 908
- oxygen supply**
  - effects of acute normovolemic hemodilution on (LI) [Nöldge, Priebe, Bohle, Buttler & Geiger], 908
- oxygen uptake**
  - effects of acute normovolemic hemodilution on (LI) [Nöldge, Priebe, Bohle, Buttler & Geiger], 908
- oxygeneration**
  - monitoring of, during liver surgery (CI) [Kainuma, Fujiwara, Kimura, Shitaokoshi, Nakashima & Shimada], 49
- surface PO<sub>2</sub>**
  - effects of acute normovolemic hemodilution on (LI) [Nöldge, Priebe, Bohle, Buttler & Geiger], 908
- surgery of**, *See under Surgery*
- Local anesthetics**, *See under Anesthetics*
- Lung(s)**
  - acute respiratory failure**
    - lung density redistribution with positioning in (CI) [Gattinoni, Pelosi, Vitale, Pesenti, D'Andrea & Mascheroni], 15
  - atelectasis**
    - effect of parainfluenza infection on, during anesthesia in sheep (LI) [Dueck, Prutow & Richman], 1044
  - bronchodilator agents**
    - albuterol
      - high-efficiency delivery of, with metered-dose inhaler in narrow tracheal tubes and catheters (LR) [Taylor & Lerman], 360
    - salbutamol
      - high-efficiency delivery of, with metered-dose inhaler in narrow tracheal tubes and catheters (LR) [Taylor & Lerman], 360
  - congenital cystic adenomatoid malformation**
    - perioperative high-frequency oscillation immediately after birth of two neonates with (CR) [Nakano, Tashiro, Nishimura, Ueyama & Uchiyama], 939
  - dynamic compliance**
    - in airway hyperreactivity, methylprednisone and, in dog model (LI) [Tobias, Sauder & Hirshman], 1115
  - edema**
    - unilateral
      - after atrial septal defect repair (CR) [Schiff & Simpson], 785
      - and lung density redistribution with positioning in ARF (CI) [Gattinoni, Pelosi, Vitale, Pesenti, D'Andrea & Mascheroni], 15
  - functional residual capacity**
    - response to anesthesia, effect of parainfluenza infection on (LI) [Dueck, Prutow & Richman], 1044
  - gas exchange**
    - with body position changes in patients with acute respiratory failure (CI) [Gattinoni, Pelosi, Vitale, Pesenti, D'Andrea & Mascheroni], 15
  - oxygen consumption**
    - effect of parainfluenza infection on, during anesthesia in sheep (LI) [Dueck, Prutow & Richman], 1044
  - parainfluenza virus**
    - effect of, on gas exchange and FRC response to anesthesia in sheep (LI) [Dueck, Prutow & Richman], 1044
  - pulmonary artery compression**
    - in anterior mediastinal mass in dogs anesthetized with halothane (LI) [Johnson, Hurst, Cujec & Mayers], 725
  - pulmonary circulation**
    - pulmonary artery pressure

- effect of parainfluenza infection on, during anesthesia in sheep (LI) [Dueck, Prutow & Richman], 1044
- pulmonary resistance**  
in airway hyperreactivity, methylprednisone and, in dog model (LI) [Tobias, Sauder & Hirshman], 1115
- respiratory failure**  
acute, caused by arytenoid dislocation after tracheal intubation (CR) [Castella, Gilabert & Perez], 613  
discontinuation of mechanical ventilation in, scintigraphy for assessment of myocardial perfusion during (CI) [Hurford, Lynch, Strauss, Lowenstein & Zapol], 1007
- shunting**  
effect of parainfluenza infection on, during anesthesia in sheep (LI) [Dueck, Prutow & Richman], 1044
- trachea**  
unusual cause of difficult extubation (CO) [Sprung, Conley & Brown], 796  
unusual cause of difficult extubation (CO) [Virag], 796
- transplantation of, See under Transplantation**
- viral respiratory infection**  
effect of, on gas exchange and FRC response to anesthesia in sheep (LI) [Dueck, Prutow & Richman], 1044

## M

- MAC, See under Potency, anesthetic**
- Magnesium, See under Ions**
- Magnesium sulfate, See under Pharmacology, tocolytic agents**
- Magnet resonance spectroscopy, See under Measurement Techniques**
- Mass spectrometry, See under Measurement techniques**
- Mast cells, See under Histamine**
- Measurement techniques**
- autoradiography**  
in assessment of benzodiazepine binding during anesthesia (LI) [Hansen, Warner, Todd, Baker & Jensen], 97
- blood pressure**  
noninvasive, accuracy of Finapres<sup>®</sup> in (CI) [Gibbs, Larach & Derr], 647
- computer-assisted tomography**  
and body position changes in patients with acute respiratory failure (CI) [Gattinoni, Pelosi, Vitale, Pesenti, D'Andrea & Mascheroni], 15
- contrast**  
echocardiographic, intraoperative detection of patent foramen ovale by (CI) [Konstadt, Lovie, Black, Rao & Scanlon], 212
- Doppler**  
transtracheal  
in intraoperative measurement of cardiac output (CI) [Siegel, Fitzgerald & Engstrom], 664
- electroencephalography**  
in study of propofol and spontaneous movements (CI) [Borgeat, Dessibourg, Popovic, Meier, Blanchard & Schwander], 24
- electromyography**  
in assessment of thermal balance and tremor patterns during epidural anesthesia (CI) [Hynson, Sessler, Glosten & McGuire], 680  
in study of closed-loop infusion of atracurium (CI) [O'Hara, Derbyshire, Overdyk, Bogen & Marshall], 258  
in study of pharmacodynamics of high-dose vecuronium in children (CI) [Sloan, Lerman & Bissonnette], 656
- Fura-2**  
in study of volatile anesthetics and stimulus-secretion coupling (LI) [Kress, Müller, Eisert, Gilge, Tas & Koschel], 309
- magnetic resonance**  
<sup>19</sup>F  
of cerebral washout of desflurane (LI) [Lockhart, Cohen, Yasuda, Freire, Taheri, Litt & Eger], 575
- mass spectrometry**  
in assessment of postoperative oxygen uptake and clonidine (CI) [Quinton, Viale, Annat, Hoen, Butin, Cottet-Emard, Levron, Bussery & Motin], 236
- microspheres**  
in assessment of influence of epinephrine on acid-base status during cardiopulmonary resuscitation (LI) [Lindner, Ahnefeld, Bowdler & Prengel], 333
- neuromuscular blockade**  
in study of closed-loop infusion of atracurium (CI) [O'Hara, Derbyshire, Overdyk, Bogen & Marshall], 258
- noninvasive blood pressure**  
erroneous blood pressure measurements in (CO) [Eames], 967  
erroneous blood pressure measurements in (CO) [Ehlers & Grabenbauer], 967
- plethysmography**  
in assessment of isoflurane-induced vasodilation and heat loss (CI) [Sessler, McGuire, Moayeri & Hynson], 226
- pneumoencephalography**  
headache after injection of air and (CR) [Katz, Lukin, Bridgenbaugh & Gunzenhauser], 615
- pulmonary artery waveform**  
and ventricular pacing inducing hemodynamically significant mitral valve regurgitation (CR) [Mark & Chetham], 375
- pulsed Doppler**  
intraoperative estimation of cardiac output by (CI) [Muhiudeen, Kuecherer, Lee, Cahalan & Schiller], 9
- pulsed Doppler flowmetry**  
in study of isoflurane *versus* halothane and human mesenteric circulation (CI) [Jacob, Boudaoud, Payen, Rabarg, Sarfati, Gossot, Villiers & Evrin], 699
- radioactive microspheres**  
in study of phlebotomy following aortic cross-clamping (LI) [Mutch, Thomson, Teskey, Thiessen & Rosenbloom], 320
- scintigraphy**  
thallium-201  
for assessment of myocardial perfusion during discontinuation of mechanical ventilation (CI) [Hurford, Lynch, Strauss, Lowenstein & Zapol], 1007
- thermal flux transducers**  
in assessment of isoflurane-induced vasodilation and heat loss (CI) [Sessler, McGuire, Moayeri & Hynson], 226
- thermodilution**  
intraoperative estimation of cardiac output by (CI) [Muhiudeen, Kuecherer, Lee, Cahalan & Schiller], 9  
in intraoperative measurement of cardiac output (CI) [Siegel, Fitzgerald & Engstrom], 664
- transesophageal echocardiography**  
intraoperative detection of patent foramen ovale by (CI) [Konstadt, Lovie, Black, Rao & Scanlon], 212  
intraoperative estimation of cardiac output by (CI) [Muhiudeen, Kuecherer, Lee, Cahalan & Schiller], 9  
in determination of perioperative thermal insulation (CI) [Sessler, McGuire & Sessler], 875
- Mechanical ventilation, See under Ventilation**
- Medetomidine, See under Sympathetic nervous system, alpha-2 adrenergic receptors**
- Medicolegal**  
obstetric anesthesia closed claims study (CI) [Chadwick, Posner, Caplan, Ward & Cheney], 242

**Memory**

**drug effects**

EEG as monitor of midazolam amnesia (CI) [Veselis, Reinsel, Alagesan, Heino & Bedford], 866

**Metabolism**

**ATP**

in desflurane-induced hypotension in dogs (LI) [Milde & Milde], 513

**free fatty acids**

effects of exogenous intravenous glucose on, in anesthetized children (CI) [Mikawa, Maekawa, Goto, Tanaka, Yaku & Obara], 1017

**glucose**

and diabetes and surgery (EV) [Alberti], 209

effects of exogenous intravenous glucose on, in anesthetized children (CI) [Mikawa, Maekawa, Goto, Tanaka, Yaku & Obara], 1017

in perioperative management of surgical patients with diabetes mellitus (MI) [Hirsch, McGill, Cryer & White], 346

**hyperglycemia**

and perioperative management of surgical patients with diabetes mellitus (MI) [Hirsch, McGill, Cryer & White], 346

**hypoglycemia**

and perioperative management of surgical patients with diabetes mellitus (MI) [Hirsch, McGill, Cryer & White], 346

**ketone bodies**

effects of exogenous intravenous glucose on, in anesthetized children (CI) [Mikawa, Maekawa, Goto, Tanaka, Yaku & Obara], 1017

**lactate**

in desflurane-induced hypotension in dogs (LI) [Milde & Milde], 513

**metabolites**

in desflurane-induced hypotension in dogs (LI) [Milde & Milde], 513

**oxygen consumption**

in desflurane-induced hypotension in dogs (LI) [Milde & Milde], 513

**phosphocreatine**

in desflurane-induced hypotension in dogs (LI) [Milde & Milde], 513

**triglycerides**

effects of exogenous intravenous glucose on, in anesthetized children (CI) [Mikawa, Maekawa, Goto, Tanaka, Yaku & Obara], 1017

**Methemoglobinemia, See under Complications**

**Methohexital, See under Anesthetic techniques, rectal**

**Methoxyflurane, See under Anesthetics volatile**

**Mexiletine, See under Analgesics**

**Microspheres, See under Measurement techniques**

**Midazolam, See under Anesthetics, intravenous; Anesthetics, rectal;**

**Hypnotics; Hypnotics, benzodiazepines; Pharmacokinetics; Pharmacology; Potency, MAC; Premedication**

**Minimum alveolar concentration, See under Potency, anesthetic**

**Mitral valve regurgitation, See under Complications**

**Mixed venous oxygen saturation, See under Monitoring**

**Monitoring**

**anesthesia care**

during posterior cervical osteotomy (CR) [Drummond, Abitbol, Sanford & Garfin], 628

for extracorporeal shock wave lithotripsy (CI) [Monk, Rater & White], 1023

**arterial blood pressure**

and artifactual hypertension due to transducer cable malfunction (CR) [Raines, Hogue, Wickens, Welch & Risk], 1149

**blood pressure**

during isoflurane *versus* sufentanil during coronary artery bypass graft surgery (CI) [Leung, Goehner, O'Kelly, Hollenberg, Pineda, Cason, Mangano & SPI Research Group], 838

**brain**

**electroencephalogram**

shows no evidence of acute tolerance to desflurane in swine (LI) [Rampil, Laster, Dwyer, Taheri & Eger], 889

**capnography**

and pulse oximetry combined, in children, single-blind study of (CI) [Coté, Rolf, Liu, Goudsouzian, Ryan, Zaslavsky, Gore, Todres, Vassallo, Polander & Alifimoff], 980

after single lung transplantation (CR) [Williams, Jellish, Modica, Eng & Tempelhoff], 621

**cardiac output**

intraoperative estimation of, by transesophageal pulsed Doppler echocardiography (CI) [Muhiudeen, Kuecherer, Lee, Cahalan & Schiller], 9

**echocardiography**

internal jugular vein cannulation guided by (CR) [Troianos & Savino], 787

**electrocardiography**

to monitor for detection of myocardial ischemia? (CO) [Slogoff & Keats], 1172

to monitor for detection of myocardial ischemia? (CO) [Steinbrook, Goldman, Mark, Philip & Raemer], 1171

of perioperative myocardial ischemia (CI) [Gordon, Urban, O'Connor & Barash], 848

postoperative myocardial ischemia and (CI) [Smith, Leung, Mangano & SPI Research Group], 464

**electroencephalography**

of midazolam amnesia (CI) [Veselis, Reinsel, Alagesan, Heino & Bedford], 866

in study of comparative pharmacodynamics of fentanyl and sufentanil (CI) [Scott, Cooke & Stanski], 34

**fiberoptic bronchoscopy**

in bilateral upper lobe obstruction from single double-lumen tube (CO) [Brodsky & Mark], 1163

**hemodynamics**

during isoflurane *versus* sufentanil during coronary artery bypass graft surgery (CI) [Leung, Goehner, O'Kelly, Hollenberg, Pineda, Cason, Mangano & SPI Research Group], 838

**hepatic venous oxygen saturation**

during liver surgery (CI) [Kainuma, Fujiwara, Kimura, Shitaokoshi, Nakashima & Shimada], 49

**Holter electrocardiography**

during isoflurane *versus* sufentanil during coronary artery bypass graft surgery (CI) [Leung, Goehner, O'Kelly, Hollenberg, Pineda, Cason, Mangano & SPI Research Group], 838

**mixed venous oxygen saturation**

during liver surgery (CI) [Kainuma, Fujiwara, Kimura, Shitaokoshi, Nakashima & Shimada], 49

**neuromuscular**

**double-burst stimulation**

effect of tetanus on, in patients receiving vecuronium (CI) [Brull, Connelly, O'Connor & Silverman], 64

**fade**

effect of tetanus on, in patients receiving vecuronium (CI) [Brull, Connelly, O'Connor & Silverman], 64

**nerve stimulator**

effect of tetanus on, in patients receiving vecuronium (CI) [Brull, Connelly, O'Connor & Silverman], 64

**posttetanic facilitation**

and subsequent monitoring in patients receiving vecuronium (CI) [Brull, Connelly, O'Connor & Silverman], 64

tetanic stimulation  
and subsequent monitoring in patients receiving vecuronium (CI) [Brull, Connelly, O'Connor & Silverman], 64

time to recovery  
effect of tetanus on, in patients receiving vecuronium (CI) [Brull, Connelly, O'Connor & Silverman], 64

train-of-four  
effect of tetanus on, in patients receiving vecuronium (CI) [Brull, Connelly, O'Connor & Silverman], 64

**neuromuscular block**  
at adductor muscles of larynx and adductor pollicis (CI) [Donati, Meistelman & Plaud], 833  
residual, nerve stimulation and (CO) [Ali & Shorten], 956  
residual, nerve stimulation and (CO) [Pedersen, Bang, Olsen, Jensen, Engbaek & Viby-Mogensen], 957

**neuromuscular junction**  
and measurement of contraction of laryngeal adductor muscles during anesthesia (CI) [Donati, Meistelman & Plaud], 827

**pressure rate quotient**  
as predictor of myocardial ischemia in patients undergoing coronary artery bypass surgery (CI) [Gordon, Urban, O'Connor & Barash], 848

**pulmonary artery pressure**  
position-monitoring catheter for (CI) [Robertie, Johnston, Williamson, Dudas, Wallenhaupt & Ganz], 440

**pulse oximetry**  
another site for probe in (CO) [Robertson & Kaplan], 198  
and capnography combined, in children, single-blind study of (CI) [Coté, Rolf, Liu, Goudsouzian, Ryan, Zaslavsky, Gore, Todres, Vassallo, Polander & Alifimoff], 980

**pulse rate**  
during isoflurane *versus* sufentanil during coronary artery bypass graft surgery (CI) [Leung, Goehner, O'Kelly, Hollenberg, Pineda, Cason, Mangano & SPI Research Group], 838

**solid-state electrocardiography**  
postoperative myocardial ischemia and (CI) [Smith, Leung, Mangano & SPI Research Group], 464

**somatosensory evoked potentials**  
etomidate and (LI) [Samra & Sorkin], 499

**transesophageal echocardiography**  
in diagnosis of pulmonary embolism following tourniquet deflation (CR) [McGrath, Hsia & Epstein], 618  
in dogs (CO) [Bashein & Martin], 958  
in dogs (CO) [Kerber & Vandenberg], 959  
during isoflurane *versus* sufentanil during coronary artery bypass graft surgery (CI) [Leung, Goehner, O'Kelly, Hollenberg, Pineda, Cason, Mangano & SPI Research Group], 838

**transesophageal pacing**  
for drug-resistant sinus bradycardia (CR) [Pattison, Atlee, Krebs, Madireddi & Kettler], 1141

**ultrasound**  
to locate site of internal jugular vein cannulation (CR) [Troianos & Savino], 787

**vocal cords**  
and measurement of contraction of laryngeal adductor muscles during anesthesia (CI) [Donati, Meistelman & Plaud], 827  
during posterior cervical osteotomy (CR) [Drummond, Abitbol, Sanford & Garfin], 628

**Monitors, See under Equipment**

**Morphine, See under Analgesics, intrathecal; Analgesics, opioids; Anesthetics, intravenous**

**Mu receptors, See under Receptors, opiate**

**Muscarinic receptors, See under Receptors**

**Muscle**

**cardiac**  
length-tension relation  
anesthetics and (LI) [Baele & Housmans], 281

sarcolemma  
volatile anesthetics depress calcium channel blocker binding to (LI) [Drenger, Quigg & Blanck], 155

**force of contraction**  
and duration of action and recovery times for vecuronium in normothermic and hypothermic patients (CI) [Heier, Caldwell, Sessler & Miller], 815

**skeletal**  
adductor pollicis  
vecuronium neuromuscular blockade at (CI) [Donati, Meistelman & Plaud], 833

larynx  
vecuronium neuromuscular blockade at (CI) [Donati, Meistelman & Plaud], 833

**Muscle relaxants**

**atracurium**  
heterogeneity of human mast cells and basophils in response to (LI) [Stellato, dePaulis, Cirillo, Mastronardi, Mazzarella & Marone], 1078

**d-tubocurarine**  
heterogeneity of human mast cells and basophils in response to (LI) [Stellato, dePaulis, Cirillo, Mastronardi, Mazzarella & Marone], 1078

**succinylcholine**  
heterogeneity of human mast cells and basophils in response to (LI) [Stellato, dePaulis, Cirillo, Mastronardi, Mazzarella & Marone], 1078

**vecuronium**  
heterogeneity of human mast cells and basophils in response to (LI) [Stellato, dePaulis, Cirillo, Mastronardi, Mazzarella & Marone], 1078

**Myelomeningocele, See under Surgery, neurosurgical**

**Myocardial infarction, See under Heart**

**Myocardial ischemia, See under Heart**

**Myocardial metabolism, See under Heart**

**Myocytes, See under Heart**

**Myofascial pain syndrome, See under Pain**

**N**

**Naloxone, See under Antagonists; Antagonists, opioid**

**Nasopharyngeal airway, See under Equipment**

**Nausea, See under Complications**

**Neonatal anesthesia, See under Anesthesia**

**Neostigmine, See under Antagonists, neuromuscular relaxants**

**Nerve stimulators, See under Equipment**

**Nerve(s)**

**block**  
autonomic  
radiowaves in denervation *versus* phenol neurolysis (CI) [Haynsworth & Noe], 459

**C-fibers**  
and new modes of nerve block (EV) [Kendig & Courtney], 207  
veratridine and (LI) [Schneider, Datta & Strichartz], 270

**differential block**  
and new modes of nerve block (EV) [Kendig & Courtney], 207  
veratridine and (LI) [Schneider, Datta & Strichartz], 270

**peripheral**  
A-delta  
analgesic concentrations of lidocaine suppress (LR) [Tanelian & MacIver], 934

- C-fibers**  
analgesic concentrations of lidocaine suppress (LR) [Tanelian & MacIver], 934
- recurrent laryngeal**  
protection of, during neck surgery (CO) [Tanigawa, Inove & Iwata], 966
- reflex sympathetic dystrophy**  
systemic alpha-adrenergic blockade with phentolamine and (CI) [Raja, Treede, Davis & Campbell], 691
- sodium channel**  
and new modes of nerve block (EV) [Kendig & Courtney], 207  
veratridine and (LI) [Schneider, Datta & Strichartz], 270
- stimulation**  
and residual neuromuscular block (CO) [Ali & Shorten], 956  
and residual neuromuscular block (CO) [Pedersen, Bang, Olsen, Jensen, Engbaek & Viby-Mogensen], 957
- vagus**  
smooth muscle contraction  
volatile anesthetics and airway intervention in (LI) [Brichart, Gunst, Warner & Rehder], 325
- Neuroeffector junction, See under Sympathetic nervous system**
- Neuromuscular block, See under Monitoring; Neuromuscular relaxants**
- Neuromuscular junction**  
**monitoring, See under Monitoring**
- Neuromuscular relaxants**  
**3-desacetylvecuronium**  
biodisposition of, in cats (LI) [Segredo, Shin, Sharma, Gruenke, Caldwell, Khuenl-Brady, Agoston & Miller], 1052
- atracurium**  
laudanosine  
formation, atracurium decay and (CI) [Nigrovic & Fox], 446  
closed-loop infusion of (CI) [O'Hara, Derbyshire, Overdyk, Bogen & Marshall], 258  
decay, and laudanosine formation (CI) [Nigrovic & Fox], 446
- continuous infusion**  
of atracurium with four different anesthetic techniques (CI) [O'Hara, Derbyshire, Overdyk, Bogen & Marshall], 258
- d-tubocurarine**  
resistance following denervation (CO) [Martyn & Hogue], 960  
resistance following denervation (CO) [Storella], 960
- neuromuscular block**  
residual, nerve stimulation and (CO) [Ali & Shorten], 956  
residual, nerve stimulation and (CO) [Pedersen, Bang, Olsen, Jensen, Engbaek & Viby-Mogensen], 957
- pancuronium**  
and desflurane, neuromuscular effects of (CI) [Caldwell, Laster, Magorian, Heier, Yasuda, Lynam, Eger & Weiskopf], 412
- succinylcholine**  
and desflurane, neuromuscular effects of (CI) [Caldwell, Laster, Magorian, Heier, Yasuda, Lynam, Eger & Weiskopf], 412  
in study of desflurane and malignant hyperthermia (LI) [Wedel, Iaizzo & Milde], 508  
in study of high-dose vecuronium in children (CI) [Sloan, Lerman & Bissonnette], 656  
the 29th Rovenstine Lecture: Clinical Challenges for the Anesthesiologist (SA) [Stoelting], 1129
- vecuronium**  
neuromuscular blockade  
at adductor muscles of larynx and adductor pollicis (CI) [Donati, Meistelman & Plaud], 833  
effect of tetanus on subsequent monitoring in patients receiving (CI) [Brull, Connelly, O'Connor & Silverman], 64  
high-dose, pharmacodynamics of, in children (CI) [Sloan, Lerman & Bissonnette], 656  
intraoperative hypothermia and, during nitrous oxide-isoflurane anesthesia (CI) [Heier, Caldwell, Sessler & Miller], 815  
neuromuscular block induced by, antagonism of (CO) [Bentley & Lahet], 1169  
neuromuscular block induced by, antagonism of (CO) [Magorian, Caldwell, Miller & Lymans], 1170  
neuromuscular blockade reversal, isoflurane discontinuation and (CI) [Baurain, d'Hollander, Melot, Dernovoi & Barvais], 474  
paralysis after long-term administration of (CO) [Agoston], 792  
paralysis after long-term administration of (CO) [Segredo, Sharma, Gruenke & Miller], 793
- Neuromuscular responses**  
**monitoring of, See under Monitoring**
- Neuromuscular transmission**  
**adductor pollicis**  
during study of intraoperative hypothermia in vecuronium blockade in nitrous oxide-isoflurane anesthesia (CI) [Heier, Caldwell, Sessler & Miller], 815
- adductor pollicis twitch response**  
effects of desflurane on, alone and with pancuronium or succinylcholine (CI) [Caldwell, Laster, Magorian, Heier, Yasuda, Lynam, Eger & Weiskopf], 412
- tests**  
tetanic fade  
in assessment of isoflurane discontinuation and vecuronium reversal (CI) [Baurain, d'Hollander, Melot, Dernovoi & Barvais], 474
- train-of-four  
in assessment of isoflurane discontinuation and vecuronium reversal (CI) [Baurain, d'Hollander, Melot, Dernovoi & Barvais], 474
- twitch height  
in assessment of isoflurane discontinuation and vecuronium reversal (CI) [Baurain, d'Hollander, Melot, Dernovoi & Barvais], 474
- twitch response**  
during study of intraoperative hypothermia in vecuronium blockade in nitrous oxide-isoflurane anesthesia (CI) [Heier, Caldwell, Sessler & Miller], 815
- Neurosurgery, See under Surgery; Surgery neurosurgical**
- Neutracer, See under Equipment**
- Nicotine receptors, See under Receptors**
- Nitrendipine, See under Pharmacology**
- Nitroprusside, See under Pharmacology**
- Nitrous oxide, See under Anesthetics gases; Anesthetics, gases**
- Noninvasive blood pressure, See under Measurement techniques**
- Norepinephrine, See under Sympathetic nervous system**
- Normocapnia, See under Carbon dioxide**
- Nystagmus, See under Complications**

O

- Obesity, See under Complications**
- Obstetric anesthesia, See under Anesthesia**
- Opioid antagonists, See under Antagonists**
- Opioids, See under Analgesics; Anesthetic techniques, spinal**
- Oral hypoglycemic agents, See under Pharmacology**
- Org 7268, See under Neuromuscular relaxants; Pharmacokinetics**
- Organizations**  
American Academy of Pediatrics: Section on Anesthesiology  
Scientific Session, April 27–29, 1990 Seattle, Washington (SM), 801



- American Board of Anesthesiology**  
examination in Critical Care Medicine, 204
- American Society of Anesthesiologists**  
Award for Excellence in Research, 204
- Society of Neurosurgical Anesthesia and Critical Care**  
Annual Meeting, October 18, 1990 Las Vegas, Nevada (SM), 801  
American Academy of Pediatrics, Section on Anesthesiology, Scientific Session (SM), 801  
Society of Neurosurgical Anesthesia and Critical Care (SM), 803
- Orthopedic anesthesia, See under Anesthesia**
- Orthopedic surgery, See under Surgery**
- Outcome**
- cardiac**  
perioperative cardiac morbidity  
in coronary artery bypass graft surgery (CI) [Smith, Leung, Mangano & SPI Research Group], 464  
perioperative myocardial ischemia  
in coronary artery bypass graft surgery (CI) [Smith, Leung, Mangano & SPI Research Group], 464
- Outpatients**  
recovery profile after desflurane-nitrous oxide *versus* isoflurane-nitrous oxide in (CI) [Ghourri, Bodner & White], 419
- Oxidant-mediated injury, See under Complications**
- Oximeter pulmonary artery catheter, See under Equipment**
- Oxygen**
- supply and demand**  
in isolated hearts, comparative effects of halothane, enflurane, and isoflurane on (LI) [Stowe, Marijic, Bosnjak & Kampine], 1087
- uptake**  
postoperative, and clonidine (CI) [Quinton, Viale, Annat, Hoen, Butin, Cottet-Emard, Levron, Bussery & Motin], 236  
administration, postanesthetic hypoxemia and (CO) [Canet, Ricos & Vidal], 1161  
administration, postanesthetic hypoxemia and (CO) [Moller], 1161

## P

- Pacemakers, See under Equipment**
- Pacing**  
atrial, transesophageal indirect, *See under Heart*
- Pain**
- central**  
poststroke, lidocaine-induced spinal block can relieve (CR) [Crisologo, Neal, Brown, McDanal & Kissin], 184  
value of spinal block in (CO) [Day], 1167  
value of spinal block in (CO) [Kissin, McDanal & Crisologo], 1168
- colorectal distention**  
naloxone-sensitive, pregnancy-induced changes in behavioral responses to (LR) [Iwasaki, Collins, Saito & Kerman-Hinds], 927
- experimental**  
in humans, effect of medetomidine on (CI) [Kauppila, Kempainen, Tanila & Pertovaara], 3
- herpes zoster**  
epidural abscess in, associated with epidural catheterization (CR) [Strong], 943
- myofascial pain syndrome**  
can cause right upper quadrant pain (CO) [Noe & Haynsworth], 956  
can cause right upper quadrant pain (CO) [Romanoff & Ellis], 955

- neuropathic**  
can be relieved by use-dependent sodium channel blockers (CR) [Tanelian & Brose], 949
- phantom limb**  
spinal anesthesia-induced, intravenous calcitonin alleviates (CR) [Fiddler & Hindman], 187
- postoperative**  
patient-controlled analgesia in, sleep apnea syndrome associated with (CR) [VanDercar, Martinez & DeLisser], 623
- reflex sympathetic dystrophy**  
epidural abscess in, associated with epidural catheterization (CR) [Strong], 943
- sympathetically maintained**  
adrenergic blockade and (CI) [Raja, Treede, Davis & Campbell], 691  
postoperative and chronic neuropathic, lidocaine suppresses (LR) [Tanelian & MacIver], 934  
and site of hemodynamic effects of intrathecal  $\alpha_2$ -adrenergic agonists (LI) [Eisenach & Tong], 766
- Palsy, See under Complications**
- Pancuronium, See under Neuromuscular relaxants**
- Pandit, S. K.**  
*Anesthesia for Ambulatory Surgery* (BR), 968
- Papillary muscles, See under Heart**
- Paradoxical embolism, See under Embolism**
- Parainfluenza virus, See under Lung(s)**
- Paralysis, See under Complications**
- Paraplegia, See under Spinal cord**
- Parasympathetic ganglia, See under Parasympathetic nervous system**
- Parasympathetic nervous system**
- acetylcholine**  
volatile anesthetics and (LI) [Brichart, Gunst, Warner & Rehder], 325
- central anticholinergic syndrome**  
glycopyrrolate (CO) [Grum], 1158  
glycopyrrolate (CO) [Shamsai], 1158  
does it exist? (CO) [Grum], 1158  
does it exist? (CO) [Shamsai], 1158
- electrical field stimulation**  
volatile anesthetics and (LI) [Brichart, Gunst, Warner & Rehder], 325
- glycopyrrolate**  
central anticholinergic syndrome following (CR) [Grum & Osborne], 191
- intramural parasympathetic ganglia**  
volatile anesthetics and (LI) [Brichart, Gunst, Warner & Rehder], 325
- postganglionic fibers**  
volatile anesthetics and (LI) [Brichart, Gunst, Warner & Rehder], 325
- scopolamine**  
transdermal, and postoperative nausea and vomiting (CO) [Bailey], 199  
transdermal, and postoperative nausea and vomiting (CO) [Hendley], 198
- Paresthesia, See under Complications**
- Parker, S. D.**  
*Clinical Applications of Ventilatory Support* (BR), 798
- Patent foramen ovale, See under Heart**
- Patient-controlled analgesia, See under Analgesia**
- Pediatric anesthesia, See under Anesthesia**
- Pediatric radiotherapy, See under Anesthesia**
- Periodic breathing, See under Complications**

**Perioperative cardiac morbidity, See under Outcome**

**Phantom limb pain, See under Pain**

**Pharmacodynamics**

**dexmedetomidine**

oral

and emergence from general anesthesia in chronically instrumented dogs (LI) [Proctor, Schmeling, Roerig, Kampine & Warltier], 108

of fentanyl and sufentanil compared, electroencephalographic quantitation of opioid effect (CI) [Scott, Cooke & Stanski], 34

of high-dose vecuronium in children (CI) [Sloan, Lerman & Bissonnette], 656

**Pharmacokinetics**

**3-desacetylvecuronium**

biodisposition of, in cats (LI) [Segredo, Shin, Sharma, Gruenke, Caldwell, Khuenl-Brady, Agoston & Miller], 1052

**age**

and spinal bupivacaine (CI) [Veering, Burm, Vletter, van den Hoeven & Spierdijk], 250

**bupivacaine**

effect of age on (CI) [Veering, Burm, Vletter, van den Hoeven & Spierdijk], 250

**cerebrospinal fluid/plasma concentrations**

of sufentanil after intrathecal administration (CI) [Hansdottir, Hedner, Woestenborghs & Nordberg], 264

**computer simulation**

and rational opioid selection (CI) [Shafer & Varvel], 53

**drugs**

brain concentration

and acute tolerance in morphine analgesia (LI) [Kissin, Brown, Robinson & Bradley], 166

infusion

and acute tolerance in morphine analgesia (LI) [Kissin, Brown, Robinson & Bradley], 166

**elimination**

cerebral of desflurane, isoflurane, and halothane from rabbit brain (LI) [Lockhart, Cohen, Yasuda, Freire, Taheri, Litt & Eger], 575

**midazolam**

intranasal

plasma concentrations of, in children (CI) [Walbergh, Willis & Eckhart], 233

**uptake**

cerebral of desflurane, isoflurane, and halothane from rabbit brain (LI) [Lockhart, Cohen, Yasuda, Freire, Litt & Eger], 575

**volatile agents**

in humans (CI) [Yasuda, Lockhart, Eger, Weiskopf, Johnson, Freire & Fassoulaki], 489

atracurium decay and laudanosine formation (CI) [Nigrovic & Fox], 446

of fentanyl and sufentanil compared, electroencephalographic quantitation of opioid effect (CI) [Scott, Cooke & Stanski], 34

percutaneous loss of desflurane, isoflurane, and halothane in humans (CI) [Fassoulaki, Lockhart, Freire, Yasuda, Eger, Weiskopf & Johnson], 479

with pocket calculator (CO) [Shafer], 631

**Pharmacology**

**adenosine**

isoflurane *versus*, and steal-prone coronary circulation in chronically instrumented dogs (LI) [Hartman, Kampine, Schmeling & Warltier], 744

**adenosine triphosphate**

changes in levels of, during anoxia, midazolam reduces (LI) [Abramowicz, Kass, Chambers & Cottrell], 1121

**ammonium chloride**

for termination of hiccups occurring under anesthesia (CO) [Bannon], 385

**amrinone**

reverses cardiac depression by isoflurane (LI) [Rooney, Stowe, Marijic, Bosnjak & Kampine], 559

**biologic response modifier**

gamma-interferon

halothane potentiates antitumor activity of (LI) [Rudnick, Stevenson, Hall, Espinoza-Delgado, Stevenson & Longo], 115

**dexmedetomidine**

effect of, on patients undergoing abdominal hysterectomy (CI) [Aho, Lehtinen, Erkola, Kallio & Korttila], 997

**diltiazem**

cardiac conduction with, and volatile anesthetics (LI) [Gallenberg, Stowe, Marijic, Kampine & Bosnjak], 519

**dose-response curve**

desflurane, neuromuscular effects of (CI) [Caldwell, Laster, Magorian, Heier, Yasuda, Lynam, Eger & Weiskopf], 412

**ephedrine**

intravenous, oral clonidine and (CI) [Nishikawa, Kimura, Taguchi & Dohi], 705

**hydroxocobalamin**

hemodynamic effects of, in conscious dogs (LI) [Riou, Gérard, Drieu La Rochelle, Bourdon, Berdeaux & Giudicelli], 552

**methylprednisolone**

prevents propranolol-induced airway hyperreactivity in dog model (LI) [Tobias, Sauder & Hirshman], 1115

**midazolam**

improves electrophysiologic recovery after anoxia in rat hippocampal slice (LI) [Abramowicz, Kass, Chambers & Cottrell], 1121

**nitrendipine**

to cardiac sarcolemma, effect of volatile anesthetics on binding of (LI) [Drenger, Quigg & Blanck], 155

**nitroprusside**

does not dilate cerebral resistance vessels during hypothermic cardiopulmonary bypass (CI) [Rogers, Prough, Gravlee, Roy, Mills, Stump, Phipps, Royster & Taylor], 820

**oral hypoglycemic agents**

in perioperative management of surgical patients with diabetes mellitus (MI) [Hirsch, McGill, Cryer & White], 346

**tocolytic agents**

magnesium sulfate

and maternal blood pressure during epidural anesthesia (LI) [Vincent, Chestnut, Sipes, Weiner, DeBruyn & Bleuer], 77

**veratridine**

inhibition of C-fibers (LI) [Schneider, Datta & Strichartz], 270  
and new modes of nerve block (EV) [Kendig & Courtney], 207

**Phenol, See under Preservatives**

**Phenothiazines, See under Ataractics**

**Phentolamine, See under Antagonists, alpha adrenergic receptor blockers**

**Phenylephrine, See under Sympathetic nervous system, alpha-adrenergic agonists**

**Phosphocreatine, See under Metabolism**

**Platelets, See under Blood**

**Plethysmography, See under Measurement techniques**

**Pneumocephalus**

tension, *See under Brain*

**Pneumoencephalography, See under Measurement techniques****Pneumothorax, See under Complications****Position**

changes in, redistribute lung density in ARF (CI) [Gattinoni, Pelosi, Vitale, Pesenti, D'Andrea &amp; Mascheroni], 15

**Positive end-expiratory pressure, See under Ventilation****Postganglionic fibers, See under Parasympathetic nervous system****Postoperative care****independent lung ventilation**

in single-lung transplant recipient (CR) [Smiley, Navedo, Kirby &amp; Schulman], 1144

**Postoperative pain, See under Pain****Potency****analgesic****tolerance**

acute, in morphine analgesia (LI) [Kissin, Brown, Robinson &amp; Bradley], 166

**anesthetic****MAC**of desflurane in surgical patients (CI) [Rampil, Lockhart, Zwass, Peterson, Yasuda, Eger, Weiskopf & Damask], 429  
of halothane, intrathecal morphine does not reduce (CI) [Licina, Schubert, Tobin, Nicodemus & Spitzer], 660**tolerance**

acute, no EEG evidence, to desflurane in swine (LI) [Rampil, Laster, Dwyer, Taheri &amp; Eger], 889

fentanyl and sufentanil (CO) [Hug], 390

fentanyl and sufentanil (CO) [Philbin, Rosow, Schneider, Koski &amp; D'Ambra], 389

fentanyl and sufentanil (CO) [Stanley &amp; Bailey], 389

**MAC****ED<sub>50</sub>**

in study of interaction of midazolam and fentanyl in enflurane-anesthetized dogs (LI) [Schweiger, Hall &amp; Hug], 1060

**enflurane**

in study of interaction of midazolam and fentanyl in enflurane-anesthetized dogs (LI) [Schweiger, Hall &amp; Hug], 1060

**fentanyl**

and midazolam, interaction of, in enflurane-anesthetized dogs (LI) [Schweiger, Hall &amp; Hug], 1060

**midazolam**

and fentanyl, interaction of, in enflurane-anesthetized dogs (LI) [Schweiger, Hall &amp; Hug], 1060

**Pregnancy****fetus****drug effects**

of labetalol (LI) [Eisenach, Mandell &amp; Dewan], 292

**neurobehavioral score**

and effects of addition of sufentanil to 0.125% bupivacaine (CI) [Vertommen, Vandermeulen, Van Aken, Vaes, Soetens, Van Steenberge, Mourisse, Willaert, Noorduyn, Devlieger &amp; Van Assche], 809

**preterm labor**

epidural anesthesia during magnesium sulfate infusion in (LI) [Vincent, Chestnut, Sipes, Weiner, DeBruyn &amp; Bleuer], 77

response of fetal heart rate to maternal administration of esmolol (CR) [Losasso, Muzzi &amp; Cucchiara], 782

**Preload recruitable stroke work, See under Heart****Premedication****dexmedetomidine**

and emergence from general anesthesia in chronically instrumented dogs (LI) [Proctor, Schmeling, Roerig, Kampine &amp; Wartier], 108

**fentanyl****oral transmucosal**

in children with congenital heart disease (CI) [Goldstein-Dresner, Davis, Kretchman, Siewers, Certo &amp; Cook], 28

**glycopyrrolate**

central anticholinergic syndrome following (CR) [Grum &amp; Osborne], 191

**midazolam****intranasal**

plasma concentrations of, in children (CI) [Walbergh, Willis &amp; Eckhart], 233

in preinduction of anesthesia in children (CI) [Spear, Yaster, Berkowitz, Maxwell, Bender, Naclerio, Manolio &amp; Nichols], 670

butorphanol and midazolam compared for sedative effects (CI) [Dershwitz, Rosow, DiBiase &amp; Zaslavsky], 717

**Preservatives****phenol**neurolysis *versus* radiofrequency lumbar sympathetic blockage (CI) [Haynsworth & Noe], 459**Pressure rate quotient, See under Monitoring****Preterm infant, See under Anesthesia, pediatric****Preterm labor, See under Pregnancy****Propofol, See under Anesthetics, intravenous****Propranolol, See under Antagonists,  $\beta$ -adrenergic; Sympathetic nervous system,  $\beta$ -adrenergic receptor antagonist****Prostatectomy, See under Surgery****Protamine, See under Blood; Blood, coagulation****Protein C, See under Protein(s)****Protein(s)****protein C**

deficiency of, as cause of pulmonary embolism in perioperative period (CR) [Sternberg, Bailey, Lazarchick &amp; Brahen], 364

**Pseudoaneurysm, See under Complications****Publications**

ethics in publishing (EV) [Smith, Miller, Saidman &amp; Morgan], 637

**Pulmonary artery catheter, See under Equipment****Pulmonary artery catheterization, See under Anesthetic techniques****Pulmonary artery compression, See under Lung(s)****Pulmonary artery pressure, See under Monitoring****Pulmonary artery waveform, See under Measurement techniques****Pulmonary circulation, See under Lung(s)****Pulmonary edema, See under Complications; Lung(s)****Pulmonary embolism, See under Complications; Embolism****Pulmonary oxygen consumption, See under Lung(s)****Pulmonary resistance, See under Lung(s)****Pulse oximetry, See under Monitoring****Pulse rate, See under Monitoring****Pulsed Doppler, See under Measurement techniques****Pulsed Doppler flowmetry, See under Measurement techniques****Purkinje fibers, See under Heart****R****Radioactive microspheres, See under Measurement techniques****Radiofrequency denervation, See under Anesthetic techniques, regional; Nerve(s), block****Radiotherapy**anesthesia for, *See under Anesthesia***Receptors****binding**

benzodiazepine, during anesthesia (LI) [Hansen, Warner, Todd, Baker &amp; Jensen], 97

**muscarinic**  
and effects of volatile anesthetics on cytoplasmic Ca<sup>2+</sup> signaling and transmitter release (LI) [Kress, Müller, Eisert, Gilge, Tas & Koschel], 309

**nicotine**  
and effects of volatile anesthetics on cytoplasmic Ca<sup>2+</sup> signaling and transmitter release (LI) [Kress, Müller, Eisert, Gilge, Tas & Koschel], 309

**opiate**  
delta  
and alpha-2 interactions (LI) [Omote, Kitahata, Collins, Nakatani & Nakagawa], 737  
mu  
and alpha-2 interactions (LI) [Omote, Kitahata, Collins, Nakatani & Nakagawa], 737

**α<sub>2</sub>-adrenergic**  
and effect of dexmedetomidine on patients undergoing abdominal hysterectomy (CI) [Aho, Lehtinen, Erkola, Kallio & Korttila], 997

**Receptors, See also under Sympathetic nervous system**

**Recovery**  
analog scales  
after desflurane-nitrous oxide *versus* isoflurane-nitrous oxide in outpatients (CI) [Ghouri, Bodner & White], 419  
**Digit-Symbol Substitution Test (DSST)**  
after desflurane-nitrous oxide *versus* isoflurane-nitrous oxide in outpatients (CI) [Ghouri, Bodner & White], 419  
emergence  
oral dexmedetomidine attenuates hemodynamic responses during (LI) [Proctor, Schmeling, Roerig, Kampine & Wartier], 108  
emergence time  
from desflurane and isoflurane in surgical patients compared (CI) [Smiley, Ornstein, Matteo, Pantuck & Pantuck], 425  
**Trieger test**  
after desflurane-nitrous oxide *versus* isoflurane-nitrous oxide in outpatients (CI) [Ghouri, Bodner & White], 419

**Rectal anesthesia, See under Anesthetic techniques; Anesthetics**

**Recurrent laryngeal nerve, See under Nerve(s)**

**Reflex sympathetic dystrophy, See under Complications; Nerve(s); Pain**

**Reflexes**  
spasticity  
intrathecal fentanyl *versus* lidocaine for (CI) [Chabal, Jacobson & Schwid], 643  
objective evaluation of, dynamic flexometer for (LR) [Chabal, Schwid & Jacobson], 609

**Regional anesthesia, See under Anesthesia**

**Renal blood flow, See under Kidney**

**Renal diuresis, See under Kidney**

**Reports of Scientific Meetings, See under Organizations**

**Respiratory depression, See under Complications**

**Respiratory failure, See under Lung(s)**

**Resting potential, See under Brain**

**Ro 15-1788, See under Antagonists**

**Ropivacaine, See under Anesthetics, local**

S

**Saint-Maurice, C., and Schulte-Steinberg, O.**  
*Regional Anaesthesia in Children* (BR), 205

**Salbutamol, See under Lung(s), bronchodilator agents**

**Sarcolemma, See under Muscle, cardiac**

**Scintigraphy, See under Measurement techniques**

**Scopolamine, See under Parasympathetic nervous system**

**Sedation**  
**intravenous**  
EEG as monitor of midazolam amnesia (CI) [Veselis, Reinsel, Alagesan, Heino & Bedford], 866  
for outpatient lithotripsy (CI) [Monk, Rater & White], 1023

**Setpoint, See under Temperature**

**Shivering, See under Temperature**

**Shock**  
**hemorrhagic**  
thoracic epidural anesthesia and (LI) [Shibata, Yamamoto, Kobayashi & Murakami], 303

**Shunting, See under Lung(s)**

**Sieber, F. E.**  
*Raised Intracranial Pressure: A Clinical Guide* (BR), 799

**Single lung transplantation, See under Surgery**

**Sinus bradycardia, See under Complications; Heart**

**Skin**  
**percutaneous anesthetic loss**  
of desflurane, isoflurane, and halothane in humans (CI) [Fassoulaki, Lockhart, Freire, Yasuda, Eger, Weiskopf & Johnson], 479  
**temperature measurement**  
isoflurane-induced vasodilation and (CI) [Sessler, McGuire, Moayeri & Hynson], 226  
**temperature, See under Temperature**

**Sleep apnea, See under Complications**

**Small intestine, See under Gastrointestinal tract**

**Society of Neurosurgical Anesthesia and Critical Care, See under Organizations**

**Sodium channel, See under Nerve(s)**

**Somatosensory evoked potentials, See under Monitoring**

**Spasticity, See under Reflexes**

**Spinal anesthesia, See under Anesthetic techniques, spinal**

**Spinal cord**  
**blood flow**  
and phlebotomy following aortic cross-clamping (LI) [Mutch, Thomson, Teskey, Thiessen & Rosenbloom], 320  
**evoked potentials**  
during paraplegia during posterior cervical osteotomy (CR) [Drummond, Abitbol, Sanford & Garfin], 628  
**paraplegia**  
during posterior cervical osteotomy (CR) [Drummond, Abitbol, Sanford & Garfin], 628

**WDR neurons**  
opiate and alpha-2 interactions in suppression of noxiously evoked activity of (LI) [Omote, Kitahata, Collins, Nakatani & Nakagawa], 737

**Spinal headache, See under Headache**

**Spine, See under Anatomy**

**Spontaneous movements, See under Complications**

**Starling's Law, See under Heart**

**Stroke, See under Complications**

**Subdural headache, See under Headache**

**Substance abuse, See under Complications**

**Succinylcholine, See under Muscle relaxants; Neuromuscular relaxants**

**Sufentanil, See under Analgesics, opioids; Anesthetics, intravenous**

**Superoxide**  
in study of oxidant-mediated injury, cell sensitivity to (LI) [Shayevitz, Varani, Ward & Knight], 1067

**Surgery**  
**cardiac**  
atrial septal defect repair  
unilateral pulmonary edema after (CR) [Schiff & Simpson], 785

- ballistocardiography  
complicating tympanoplasty (CO) [Gronert & Reitan], 1166
- cardiopulmonary bypass  
alpha-stat, and cerebral blood flow, during decreased systemic flow and pressure (LI) [Hindman, Funatsu, Harrington, Cutkomp, Miller, Todd & Tinker], 1096  
blood gas management, and cerebral blood flow, during decreased systemic flow and pressure (LI) [Hindman, Funatsu, Harrington, Cutkomp, Miller, Todd & Tinker], 1096  
hypothermic, nitroprusside does not dilate cerebral resistance vessels during (CI) [Rogers, Prough, Gravlee, Roy, Mills, Stump, Phipps, Royster & Taylor], 820  
pH-stat, and cerebral blood flow, during decreased systemic flow and pressure (LI) [Hindman, Funatsu, Harrington, Cutkomp, Miller, Todd & Tinker], 1096  
successful resuscitation with, in carbon dioxide embolism (CR) [Diakun], 1151  
therapy of protamine-induced pulmonary hypertension during (LI) [Nuttall, Murray & Bowie], 138
- coronary artery bypass grafting  
hemodynamic consequences of desmopressin after (CI) [Frankville, Harper, Lake & Johns], 988  
postoperative myocardial ischemia in (CI) [Smith, Leung, Mangano & SPI Research Group], 464  
anesthetic management of patient with hypokalemic familial periodic paralysis undergoing (CR) [Lema, Urzua, Moran Canessa], 373  
barbiturate protection and (CI) [Zaidan, Klochany, Martin, Ziegler, Harless & Andrews], 406  
barbiturate protection and (EV) [Todd, Hindman & Warner], 402  
epinephrine inhibition by magnesium during (CI) [Prielipp, Zalog, Butterworth, Robertie, Dudas, Black & Royster], 973  
in truncus arteriosus: recognition and therapy of intraoperative cardiac ischemia (CR) [Wong, Baum & Sangwan], 378
- cervical osteotomy  
posterior, transient paraplegia during (CR) [Drummond, Abitbol, Sanford & Garfin], 628
- coronary artery bypass graft  
isoflurane *versus* sufentanil anesthesia for (CI) [Leung, Goehner, O'Kelly, Hollenberg, Pineda, Cason, Mangano & SPI Research Group], 838
- coronary artery bypass grafting  
pressure rate quotient as predictor of myocardial ischemia during (CI) [Gordon, Urban, O'Connor & Barash], 848
- head and neck  
protection of recurrent laryngeal nerve during (CO) [Tanigawa, Inove & Iwata], 966
- hepatic  
hepatic venous oxygen saturation during (CI) [Kainuma, Fujiwara, Kimura, Shitaokoshi, Nakashima & Shimada], 49
- hysteroscopy  
carbon dioxide embolism in: successful resuscitation with cardiopulmonary bypass (CR) [Diakun], 1151
- laparoscopy  
carbon dioxide embolism in: successful resuscitation with cardiopulmonary bypass (CR) [Diakun], 1151
- neurosurgical  
myelomeningocele  
rectal methohexital causing apnea in patients with (CR) [Yemen, Pullerits, Stillman & Hershey], 1139  
complication from nasopharyngeal airway in (CR) [Muzzi, Lo-sasso & Cucchiara], 366
- orthopedic  
tourniquet deflation following, massive pulmonary embolism in (CR) [McGrath, Hsia & Epstein], 618
- prostatectomy  
fatal massive air embolism during (CR) [Vacanti & Lodh], 186
- sutures  
removal after cheiloplasty, insufflation anesthesia for (CO) [Christenson & Presson], 382
- thoracic  
for resection of bilateral pulmonary metastases intraoperative hypoxemia complicating (CR) [Antognini & Hanowell], 1137
- thoracotomy  
brachial plexus compression from malpositioned chest tube after (CR) [Mangar, Kelly, Holder & Camporesi], 780
- tracheostomy  
double-lumen endobronchial tube for (CO) [Brodsky, Tobler & Mark], 387
- transplantation  
cadaver kidney graft  
bronchospasm following revascularization of (CO) [Bardoczky, Rausin, Hennart & dePauw], 200  
single lung  
capnography after (CR) [Williams, Jellish, Modica, Eng & Tempelhoff], 621
- tympanoplasty  
ballistocardiography complicating (CO) [Gronert & Reitan], 1166
- Sutures, See under Surgery**
- Swine, See under Animals**
- Sympathectomy, See under Sympathetic nervous system**
- Sympathetic blockade, See under Sympathetic nervous system**
- Sympathetic ganglion block, See under Anesthetic techniques**
- Sympathetic nervous system**
- alpha-2 adrenergic agonists  
clonidine  
respiratory effects of, alone and combined with morphine, in humans (CI) [Bailey, Sperry, Johnson, Eldredge, East, East, Pace & Stanley], 43  
dexmedetomidine  
and emergence from general anesthesia in chronically instrumented dogs (LI) [Proctor, Schmeling, Roerig, Kampine & Wartier], 108
- alpha-2 adrenergic receptors  
medetomidine  
systemic, effect of, on experimental pains in humans (CI) [Kauppila, Kempainen, Tanila & Pertovaara], 3
- alpha-2 adrenoceptor agonists  
role in clinical anesthesia (MI) [Maze & Tranquilli], 581
- alpha-2 agonist  
clonidine  
interaction between opiate subtype and, in suppression of activity of WDR neurons (LI) [Omote, Kitahata, Collins, Nakatani & Nakagawa], 737
- alpha-adrenergic agonists  
clonidine  
site of hemodynamic effects of (LI) [Eisenach & Tong], 766  
phenylephrine  
in study of nitroprusside during hypothermic cardiopulmonary bypass (CI) [Rogers, Prough, Gravlee, Roy, Mills, Stump, Phipps, Royster & Taylor], 820
- alpha-adrenergic receptors  
and adrenergic blockade and sympathetic pain (CI) [Raja, Treede, Davis & Campbell], 691

**autonomic nervous system**

**blockade**

alteration of left ventricular diastolic function by desflurane, isoflurane, and halothane in (LI) [Pagel, Kampine, Schmeling & Warltier], 1103

**ganglionic blockers**

**hexamethonium**

terminates bupivacaine toxicity (LI) [Bernards & Artru], 89

**beta-adrenergic agonists**

**esmolol**

in ballistocardiography complicating tympanoplasty (CO) [Gronert & Reitan], 1166

**blockade**

in study of hemodynamic effects of desflurane (LI) [Pagel, Kampine, Schmeling & Warltier], 539

for vascular insufficiency after repair of radial club hands in infant (CR) [Audenaert, Vickers & Burgess], 368

**catecholamines**

**neuroeffector junction**

uptake, and influence of ketamine on myocardial contractility (LI) [Cook, Carton & Housmans], 880

**nonrepinephrine**

uptake, and influence of ketamine on myocardial contractility (LI) [Cook, Carton & Housmans], 880

postoperative oxygen uptake and (CI) [Quinton, Viale, Annat, Hoen, Butin, Cottet-Emard, Levron, Bussery & Motin], 236

**clonidine**

oral, and intravenous ephedrine (CI) [Nishikawa, Kimura, Taguchi & Dohi], 705

postoperative oxygen uptake and (CI) [Quinton, Viale, Annat, Hoen, Butin, Cottet-Emard, Levron, Bussery & Motin], 236

**dopamine**

determination of, in study of volatile anesthetics and stimulus-secretion coupling (LI) [Kress, Müller, Eisert, Gilge, Tas & Koschel], 309

**epinephrine**

and acid-base status during cardiopulmonary resuscitation (LI) [Lindner, Ahnefeld, Bowdler & Prengel], 333

cardiovascular effects of, in relation to extent of preoperative  $\beta$ -adrenoceptor blockade (CI) [Tarnow & Müller], 1035

changes in concentrations of, during epidural anesthesia are dependent upon level of block (CI) [Stevens, Artuso, Kao, Bray, Spitzer & Müller], 1029

influence of, on thoracic epidural anesthesia and hemorrhagic shock (LI) [Shibata, Yamamoto, Kobayashi & Murakami], 303

low-dose, magnesium inhibits hypertensive but not cardiotoxic actions of (CI) [Prielipp, Zaloga, Butterworth, Robertie, Dudas, Black & Royster], 973

myocardial sensitization by halothane (LI) [Hayashi, Sumikawa, Yamatodani, Kamibayashi, Kuro & Yoshiya], 134

in preoperative management of surgical patients with diabetes mellitus (MI) [Hirsch, McGill, Cryer & White], 346

**esmolol**

response of fetal heart rate to maternal administration of (CR) [Losasso, Muzzi & Cucchiara], 782

**isoproterenol**

myocytes exposed to, halothane and delayed afterdepolarizations in (LI) [Freeman & Li], 146

in study of cardiovascular effects of epinephrine in relation to extent of preoperative  $\beta$ -adrenoceptor blockade (CI) [Tarnow & Müller], 1035

**labetalol**

maternal and fetal effects of, in pregnant ewes (LI) [Eisenach, Mandell & Dewan], 292

**norepinephrine**

changes in concentrations of, during epidural anesthesia are dependent upon level of block (CI) [Stevens, Artuso, Kao, Bray, Spitzer & Müller], 1029

determination of, in study of volatile anesthetics and stimulus-secretion coupling (LI) [Kress, Müller, Eisert, Gilge, Tas & Koschel], 309

influence of, on thoracic epidural anesthesia and hemorrhagic shock (LI) [Shibata, Yamamoto, Kobayashi & Murakami], 303

**receptors**

**alpha-2 agonists**

and dexmedetomidine and emergence from anesthesia (LI) [Proctor, Schmeling, Roerig, Kampine & Warltier], 108

**sympathetomy**

**chemical**

percutaneous lumbar (CI) [Haynsworth & Noe], 459

and acute hypovolemia during induced hypotension (CO) [Hoka], 953

and acute hypovolemia during induced hypotension (CO) [Taneyama & Goto], 954

**$\alpha_2$ -adrenergic agonists**

**clonidine**

oral-transdermal, clinical efficacy of, during perioperative period (CI) Segal, Jarvis, Duncan, White & Maze, 220

**$\alpha$ -adrenergic agonist**

**dexmedetomidine**

effect of, on patients undergoing abdominal hysterectomy (CI) [Aho, Lehtinen, Erkola, Kallio & Korttila], 997

**$\beta$ -adrenergic receptor antagonist**

**propranolol**

airway hyperreactivity induced by, methylprednisone prevents, in dog model (LI) [Tobias, Sauder & Hirshman], 1115

**$\beta$ -adrenergic receptor blockade**

preoperative, cardiovascular effects of epinephrine in relation to extent of (CI) [Tarnow & Müller], 1035

**Syringes, See under Equipment**

**Systemic vascular resistance, See under Blood**

**T**

**Temperature**

**central**

during study of intraoperative hypothermia in vecuronium blockade in nitrous oxide-isoflurane anesthesia (CI) [Heier, Caldwell, Sessler & Miller], 815

**hypothermia**

**induced**

for cardiopulmonary bypass, nitroprusside does not dilate cerebral resistance vessels during (CI) [Rogers, Prough, Gravlee, Roy, Mills, Stump, Phipps, Royster & Taylor], 820

in isoflurane-induced vasodilation (CI) [Sessler, McGuire, Moayeri & Hynson], 226

and tremor patterns during epidural anesthesia (CI) [Hynson, Sessler, Glosten & McGuire], 680

**postoperative**

and perioperative thermal insulation (CI) [Sessler, McGuire & Sessler], 875

and cerebral blood flow during decreased systemic flow and pressure (LI) [Hindman, Funatsu, Harrington, Cutkomp, Miller, Todd & Tinker], 1096

- measurement**  
**skin**  
 isoflurane-induced vasodilation and (CI) [Sessler, McGuire, Moayeri & Hynson], 226  
 and tremor patterns during epidural anesthesia (CI) [Hynson, Sessler, Glosten & McGuire], 680  
 thermal flux transducers  
 and tremor patterns during epidural anesthesia (CI) [Hynson, Sessler, Glosten & McGuire], 680  
 tympanic membrane  
 in assessment of thermal balance and tremor patterns during epidural anesthesia (CI) [Hynson, Sessler, Glosten & McGuire], 680  
 isoflurane-induced vasodilation and (CI) [Sessler, McGuire, Moayeri & Hynson], 226
- regulation**  
**setpoint**  
 in assessment of thermal balance and tremor patterns during epidural anesthesia (CI) [Hynson, Sessler, Glosten & McGuire], 680  
 isoflurane-induced vasodilation and (CI) [Sessler, McGuire, Moayeri & Hynson], 226  
**threshold**  
 in assessment of thermal balance and tremor patterns during epidural anesthesia (CI) [Hynson, Sessler, Glosten & McGuire], 680  
 isoflurane-induced vasodilation and (CI) [Sessler, McGuire, Moayeri & Hynson], 226
- shivering**  
 and oxygen uptake after major abdominal surgery (CI) [Quinton, Viale, Annat, Hoen, Butin, Cottet-Emard, Levron, Bussery & Motin], 236
- skin**  
 during study of intraoperative hypothermia in vecuronium blockade in nitrous oxide-isoflurane anesthesia (CI) [Heier, Caldwell, Sessler & Miller], 815
- thermoregulation**  
 in assessment of thermal balance and tremor patterns during epidural anesthesia (CI) [Hynson, Sessler, Glosten & McGuire], 680  
 isoflurane-induced vasodilation and (CI) [Sessler, McGuire, Moayeri & Hynson], 226  
 and oxygen uptake after major abdominal surgery (CI) [Quinton, Viale, Annat, Hoen, Butin, Cottet-Emard, Levron, Bussery & Motin], 236  
 and perioperative thermal insulation (CI) [Sessler, McGuire & Sessler], 875
- Tension pneumocephalus, See under Brain**  
**Tetanic fade, See under Neuromuscular transmission, tests**  
**Tetracaine, See under Anesthetics, local**  
**Theories of anesthesia**  
 anesthetic action  
 on resting membrane potential (LI) [MacIver & Kendig], 83  
**Thermal flux transducers, See under Heat; Measurement techniques; Temperature, measurement**  
**Thermodilution, See under Measurement techniques**  
**Thermoregulation, See under Temperature**  
**Thiopental, See under Anesthetics; Anesthetics, intravenous**  
**Thompson chin support, See under Equipment**  
**Thoracic anesthesia, See under Anesthesia**  
**Thoracic epidural anesthesia, See under Anesthetic techniques**  
**Thoracic surgery, See under Surgery**  
**Thoracotomy, See under Surgery**  
**Thrombocytopenia, See under Blood**
- Tobias, J. D.**  
*Anesthetic Management of Difficult and Routine Pediatric Patients* (BR), 798  
*Anesthetic Management of Difficult and Routine Pediatric Patients, Second Edition* (BR), 798
- Tocolytic agents, See under Pharmacology**  
**Tolerance, See under Potency, anesthetic**  
**Tomography, See under Measurement techniques**  
**Total spinal anesthesia, See under Complications**  
**Tourniquet, See under Equipment**  
**Toxicity**  
**cardiovascular**  
 of bupivacaine, hexamethonium and midazolam terminate (LI) [Bernards & Artru], 89  
**cocaine**  
 in cocaine and organophosphates use (CO) [Herschman & Aaron], 631  
**cyanide**  
 and hemodynamic effects of hydroxocobalamin in conscious dogs (LI) [Riou, Gérard, Drieu La Rochelle, Bourdon, Berdeaux & Giudicelli], 552  
**cytotoxicity**  
 halothane potentiates antitumor activity of gamma-interferon (LI) [Rudnick, Stevenson, Hall, Espinoza-Delgado, Stevenson & Longo], 115
- drug**  
 butorphanol and midazolam compared for sedative effects (CI) [Dershwitz, Rosow, DiBiase & Zaslavsky], 717
- standards**  
 recantation revisited (CO) [Bruce], 1160
- Trachea, See under Lung(s)**  
**Tracheal extubation, See under Anesthetic techniques**  
**Tracheal intubation, See under Anesthetic techniques; Intubation**  
**Tracheal tubes, See under Equipment**  
**Tracheostomy, See under Surgery**  
**Train-of-four, See under Neuromuscular transmission, tests**  
**Transdermal anesthesia, See under Anesthetic techniques**  
**Transesophageal echocardiography, See under Measurement techniques; Monitoring**  
**Transesophageal indirect atrial pacing, See under Heart**  
**Transesophageal pacing, See under Monitoring**  
**Transfusion**  
**autologous**  
 hypotension during (CR) [Miller, Scherba-Krugliak, Toy & Drasner], 624  
 in anemia in former preterm infants (CI) [Welborn, Hannallah, Luban, Fink & Ruttimann], 1003  
 modified Y-type set for (CO) [Ho & Contardi], 203  
 hyperkalemia induced by (CO) [Bucol & Short], 1168  
 hyperkalemia induced by (CO) [Jameson, Popic & Harms], 1169  
**Transfusion device, See under Equipment**  
**Transplantation**  
**lung**  
 postoperative independent lung ventilation in (CR) [Smiley, Navedo, Kirby & Schulman], 1144  
*See also under Surgery*  
**Transtracheal jet ventilation, See under Anesthetic techniques**  
**Trieger test, See under Recovery**  
**Trifluoperazine, See under Ataractics, phenothiazines**  
**Triglycerides, See under Metabolism**  
**Truncus arteriosus, See under Complications**  
**Tubes, See under Equipment**  
**Tumor cells, See under Cells**

**Twitch height**, *See under* Neuromuscular transmission, tests  
**Twitch response**, *See under* Neuromuscular transmission  
**Tympanic membrane**, *See under* Ear; Temperature, measurement  
**Tympanoplasty**, *See under* Surgery

U

**Ulatowski, J. A.**  
*Spinal Cord Injuries: Anesthetic and Associated Care* (BR), 1176  
**Ultrasound**, *See under* Monitoring  
**Uptake of drugs**, *See under* Pharmacokinetics  
**Uremia**, *See under* Complications

V

**Vagus nerve**, *See under* Nerve(s)  
**Vasoconstriction**, *See under* Blood vessels  
**Vasodilation**, *See under* Blood vessels  
**Vecuronium**, *See under* Muscle relaxants; Neuromuscular relaxants  
**Veins**  
  **internal jugular**  
    cannulation guided by echocardiography (CR) [Troianos & Savino], 787  
    percutaneous catheterization of, new anatomic landmarks for (CO) [Oshima, Arai & Urabe], 1164  
    reversed flow (CO) [Yonei & Sari], 634  
**Venous air embolism**, *See under* Embolism; Embolism, air  
**Ventilation**  
  **apnea**  
    as contraindication for patient-controlled analgesia (CR) [Vandercar, Martinez & DeLisser], 623  
  **high-frequency oscillation**  
    immediately after birth of two neonates with congenital cystic adenomatoid malformation (CR) [Nakano, Tashiro, Nishimura, Ueyama & Uchiyama], 939

**intermittent positive pressure**  
  with capnography after single lung transplantation (CR) [Williams, Jellish, Modica, Eng & Tempelhoff], 621  
**mechanical**  
  ventilator dependence  
    scintigraphy for assessment of myocardial perfusion in (CI) [Hurford, Lynch, Strauss, Lowenstein & Zapol], 1007  
  **positive end-expiratory pressure**  
    and lung density redistribution with positioning in ARF (CI) [Gattinoni, Pelosi, Vitale, Pesenti, D'Andrea & Mascheroni], 15  
    depression of, by desflurane in humans (CI) [Lockhart, Rampil, Yasuda, Eger & Weiskopf], 484  
    respiratory effects of clonidine alone and combined with morphine, in humans (CI) [Bailey, Sperry, Johnson, Eldredge, East, East, Pace & Stanley], 43  
**Ventilatory depression**, *See under* Complications  
**Ventricles**, *See under* Heart  
**Ventricular function**, *See under* Heart  
**Veratridine**, *See under* Pharmacology  
**Viral respiratory infection**, *See under* Complications, pulmonary; Lung(s)

Virus

**respiratory**  
    general anesthesia in patients with (EV) [Jacoby & Hirshman], 969

**Vocal cords**, *See under* Larynx

**Vomiting**

**postoperative**  
    and nausea, transdermal scopolamine and (CO) [Hendley], 198  
    and nausea, transdermal scopolamine and (CO) [Bailey], 199

W

**WDR neurons**, *See under* Spinal cord  
**Wenckebach's periodicity**, *See under* Heart  
**White, P.F. (ed.)**  
  *Outpatient Anesthesia* (BR), 205
